# Supplementary material for: An improved transcriptome annotation reveals asymmetric expression and distinct regulation patterns in allotetraploid common carp
Source: PubMed Central journal article supplement (PMC11579021; doi:10.1038/s42003-024-07177-3), 2024-11-20
Supplement: 42003_2024_7177_MOESM1_ESM.pdf [file 42003_2024_7177_MOESM1_ESM.pdf]

## Supplementary Figures

|                                                                                                                  |    |
|------------------------------------------------------------------------------------------------------------------|----|
| Fig. S1. Read length distribution of PacBio SMRT sequencing data.....                                            | 3  |
| Fig. S2. Summary of transcriptional and post-transcriptional events identified in common carp ....               | 4  |
| Fig. S3. Comparison of length distributions between transcriptome annotations of common carp and zebrafish ..... | 5  |
| Fig. S4. Sequence features of isoforms in different annotation groups.....                                       | 6  |
| Fig. S5. Expression profiles of isoforms in different annotation groups.....                                     | 7  |
| Fig. S6. Protein sequence identity and expression profiles of isoforms in different annotation groups.....       | 8  |
| Fig. S7. Chromosome distribution of genes with alternative splicing events .....                                 | 9  |
| Fig. S8. Intersection of homoeologous genes with alternative splicing between the A and B subgenomes.....        | 10 |
| Fig. S9. Comparison of expression levels of genes with alternative splicing in the two subgenomes .....          | 11 |
| Fig. S10. Statistics on the number of isoforms expressed in nine organs .....                                    | 12 |
| Fig. S11. Summary of GO terms enriched in genes with alternative splicing in the A and B subgenomes.....         | 13 |
| Fig. S12. Summary of alternative splicing events identified by Illumina and SMRT sequencing..                    | 14 |
| Fig. S13. Length distribution of lncRNAs in the updated annotation.....                                          | 15 |
| Fig. S14. Schematic of collinearity between lncRNAs originating from the A and B subgenomes in common carp.....  | 16 |
| Fig. S15. Comparison of expression patterns of lncRNAs and protein-coding mRNAs in nine organs.....              | 17 |
| Fig. S16. Comparison of the lncRNA expression levels in the A and B subgenomes.....                              | 18 |
| Fig. S17. Summary of GO terms enriched in lncRNA host genes in the A and B subgenomes.....                       | 19 |
| Fig. S18. Expression correlation and Euclidean distance of lncRNA–mRNA pairs in common carp .....                | 20 |
| Fig. S19. Expression correlation and Euclidean distance of lncRNA–mRNA pairs in the A and B subgenomes.....      | 21 |

|                                                                                                                    |    |
|--------------------------------------------------------------------------------------------------------------------|----|
| Fig. S20. Distribution of circRNAs in the two subgenomes of common carp.....                                       | 22 |
| Fig. S21. Comparison of the sequence features of introns flanking circRNA in the A and B subgenomes.....           | 23 |
| Fig. S22. Comparison of the percentage of flanking introns with various transposons in the A and B subgenomes..... | 24 |
| Fig. S23. Expression profiling of circRNAs in nine organs.....                                                     | 25 |
| Fig. S24. Number and base substitution frequency of various types of RNA editing sites.....                        | 26 |
| Fig. S25. Upset plot of RNA editing sites identified in nine organs.....                                           | 27 |
| Fig. S26. Statistics on the number of RNA editing sites in the A and B subgenomes of common carp.....              | 28 |
| Fig. S27. Base substitution frequency of RNA editing sites in homoeologous genes.....                              | 29 |
| Fig. S28. Comparison of base substitution frequency of RNA editing sites shared by nine organs in common carp..... | 30 |
| Fig. S29. Enrichment of RNA editing sites in various genetic elements.....                                         | 31 |
| Fig. S30. Genome distribution of RNA editing sites in the A and B subgenomes.....                                  | 32 |

1 **Fig. S1. Read length distribution of PacBio SMRT sequencing data**

A

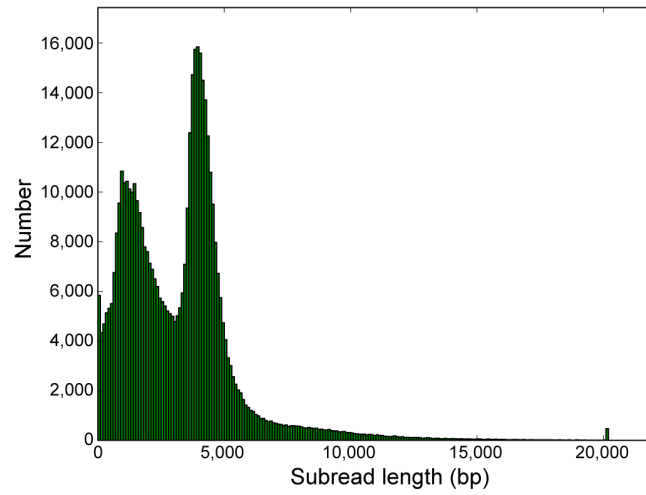

B

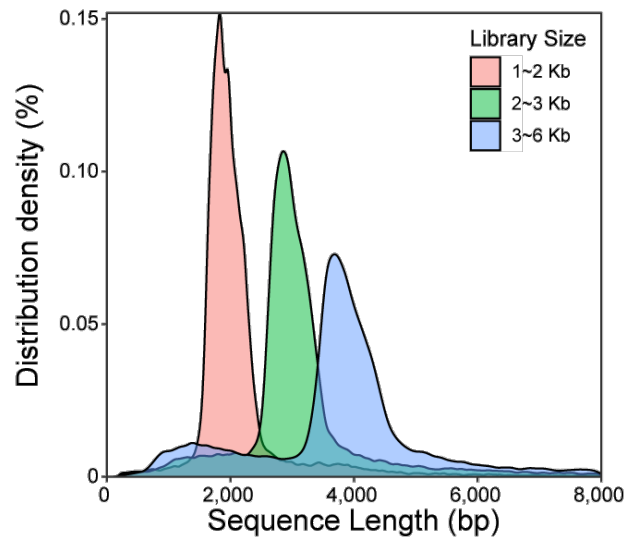

2 (A). Histogram plot of subread number grouped by length (bin = 100 bp). (B). Distribution density of ROI  
3 (Read of Insert) length for PacBio SMRT sequencing.

4

5

6 **Fig. S2. Summary of transcriptional and post-transcriptional events**  
 7 **identified in common carp**

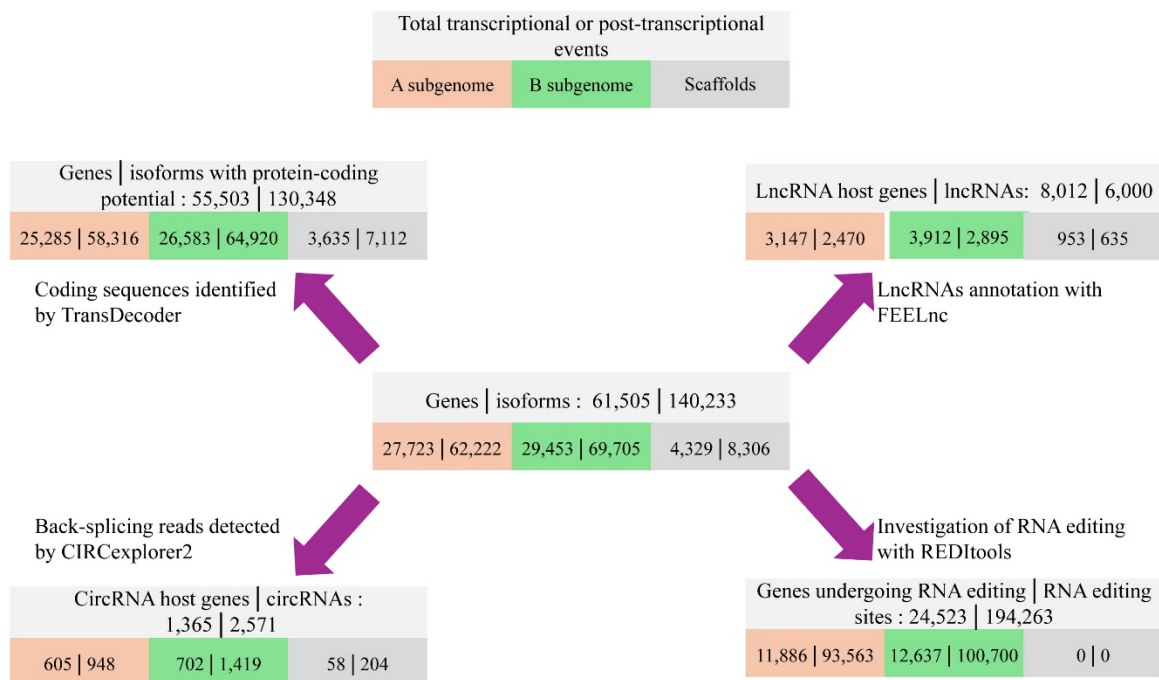

8  
 9 \*: RNA editing events were not detected in the scaffold sequences due to issues with the identification  
 10 pipeline.

11  
 12

13 **Fig. S3. Comparison of length distributions between transcriptome**  
14 **annotations of common carp and zebrafish**

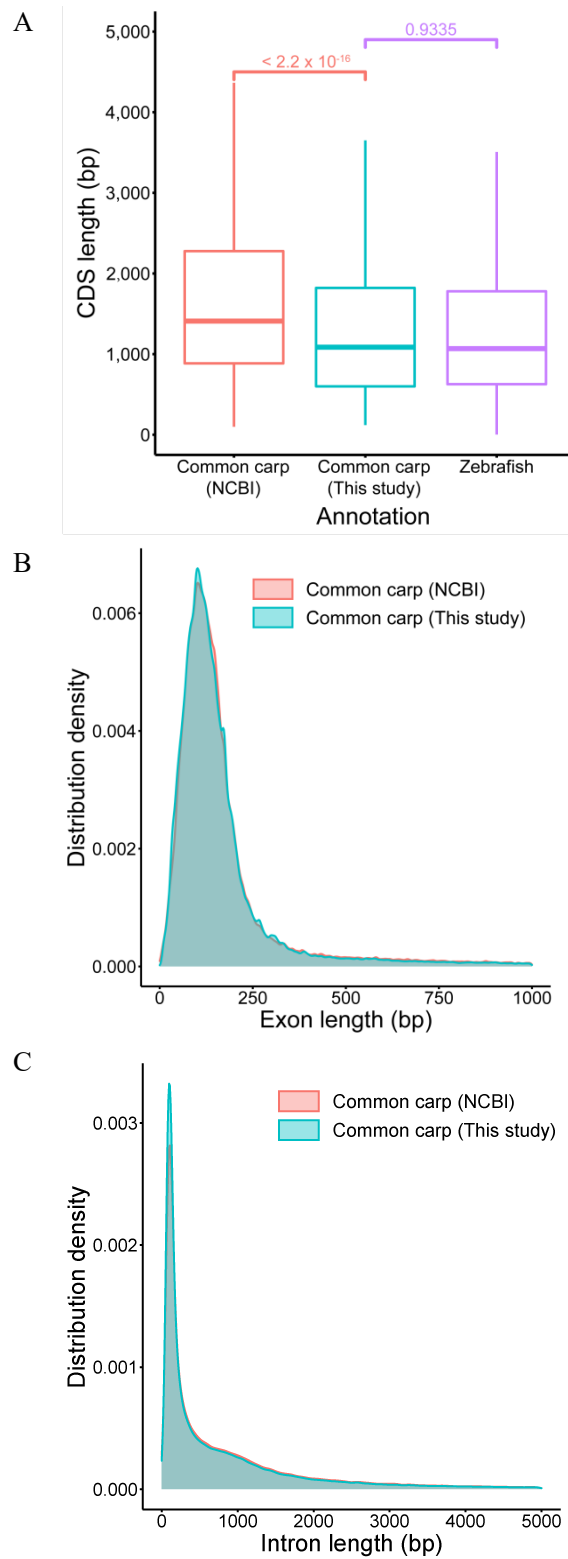

15 (A) Although CDS length of the updated annotation was lower than that of the NCBI reference annotation  
16 of common carp, it was equivalent to the CDS length of the zebrafish transcriptome annotation (Wilcoxon  
17 rank-sum test). The length of exon (B) and intron (C) did not show significantly difference between the  
18 updated annotation and the NCBI reference annotation (Wilcoxon rank-sum test).

19 **Fig. S4. Sequence features of isoforms in different annotation groups**

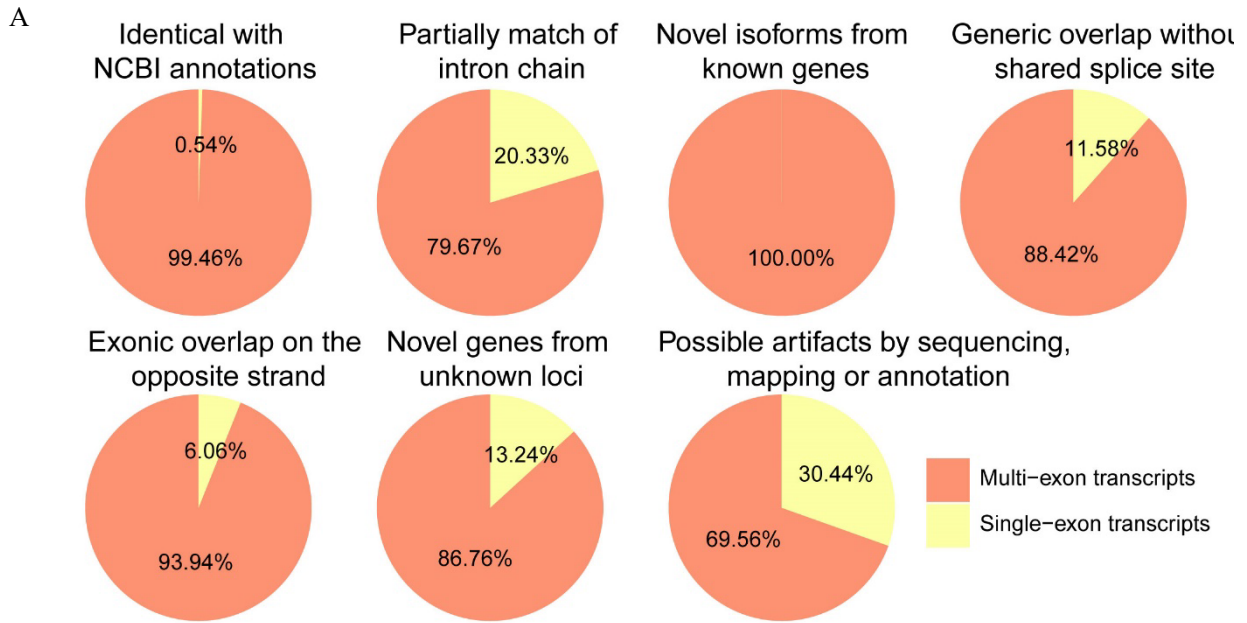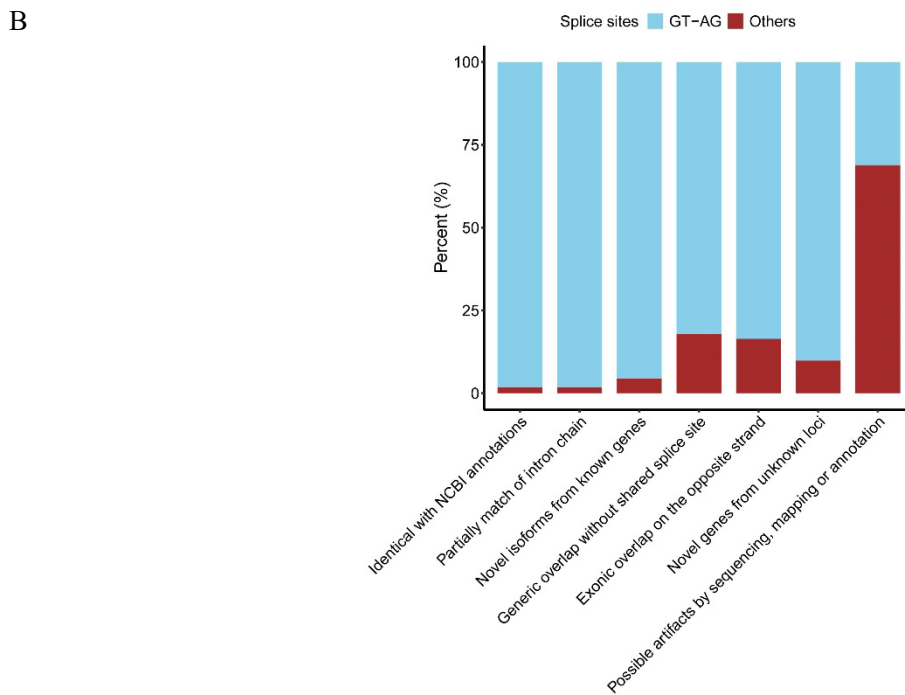

20 (A) The pie chart illustrated the classification of multi-exon and single-exon transcripts in different groups.

21 (B) The bar plot showed the percentage of splicing signal detect at intron sites.

22

23

24

25

26 **Fig. S5. Expression profiles of isoforms in different annotation groups**

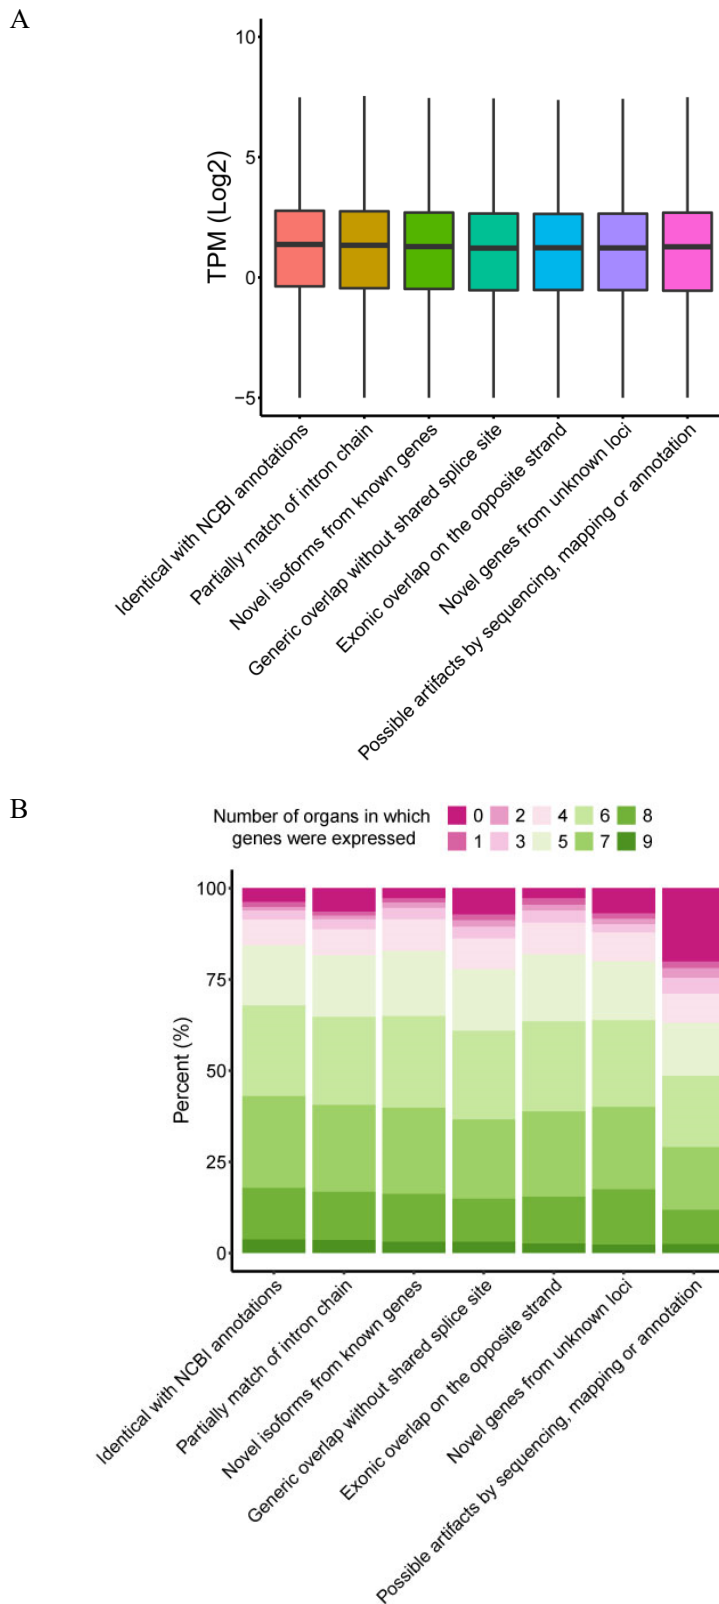

27

28 (A) The boxplot illustrated the expression levels of various isoforms grouped by different gene model

29 matches. (B) The bar plot demonstrated the expression specificity of isoforms in different groups across

30 nine organs.

31 **Fig. S6. Protein sequence identity and expression profiles of isoforms in**  
 32 **different annotation groups.**

A

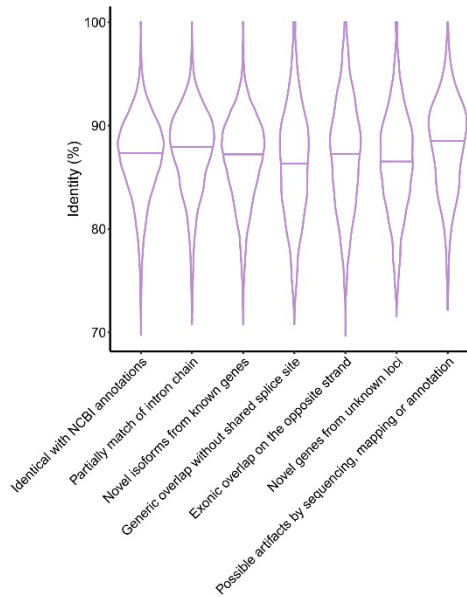

B

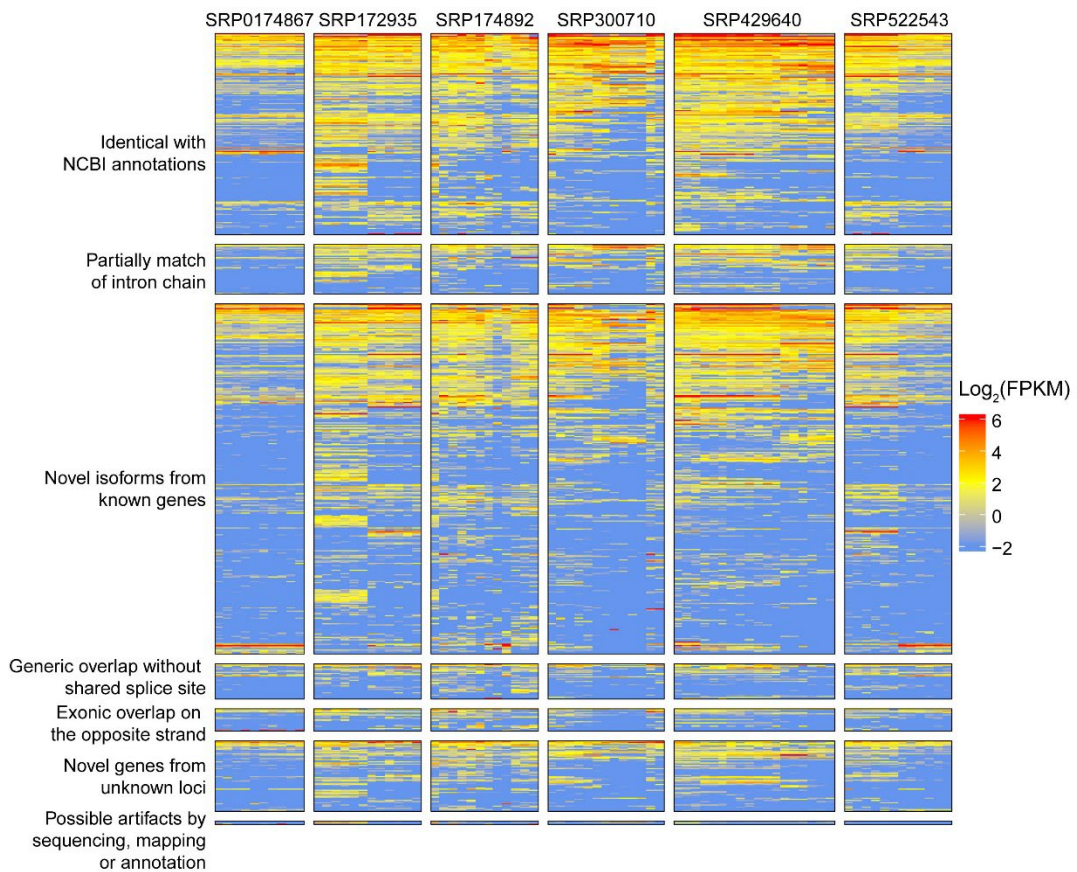

33 (A) The boxplot illustrated the sequence identity of various protein-coding isoforms in different groups  
 34 with zebrafish proteins. (B) The heatmap showed the expression profiles of identified isoforms in various  
 35 RNA-seq experiments (downloaded from the NCBI SRA database). Accessions were showed in the top  
 36 panel.  
 37



38 **Fig. S7. Chromosome distribution of genes with alternative splicing events**

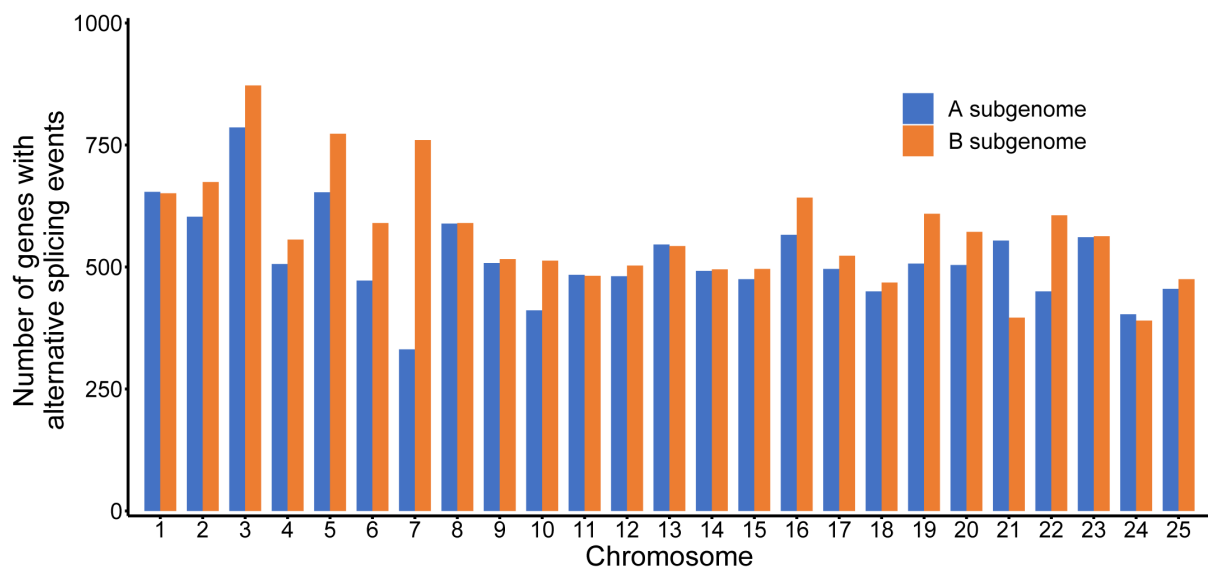

39  
40  
41  
42

43 **Fig. S8. Intersection of homoeologous genes with alternative splicing**  
44 **between the A and B subgenomes**

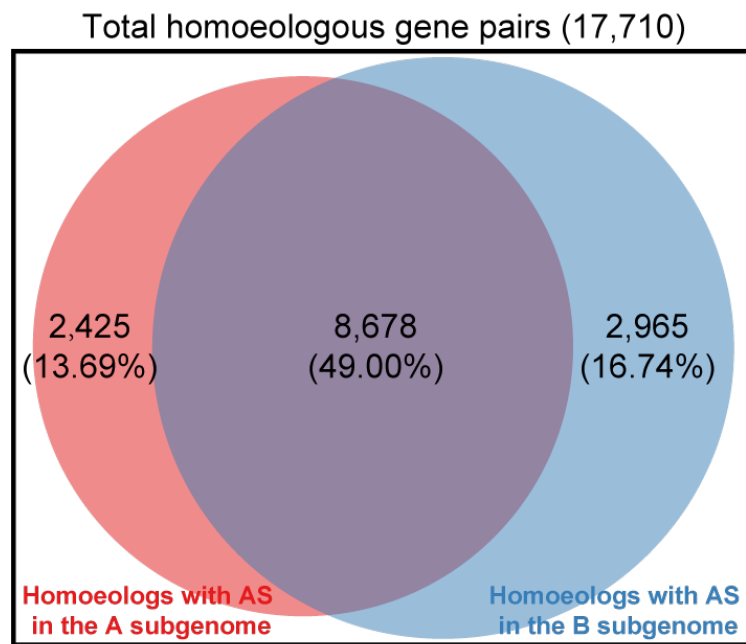

45  
46  
47  
48  
49  
50

51 **Fig. S9. Comparison of expression levels of genes with alternative splicing**  
 52 **in the two subgenomes**

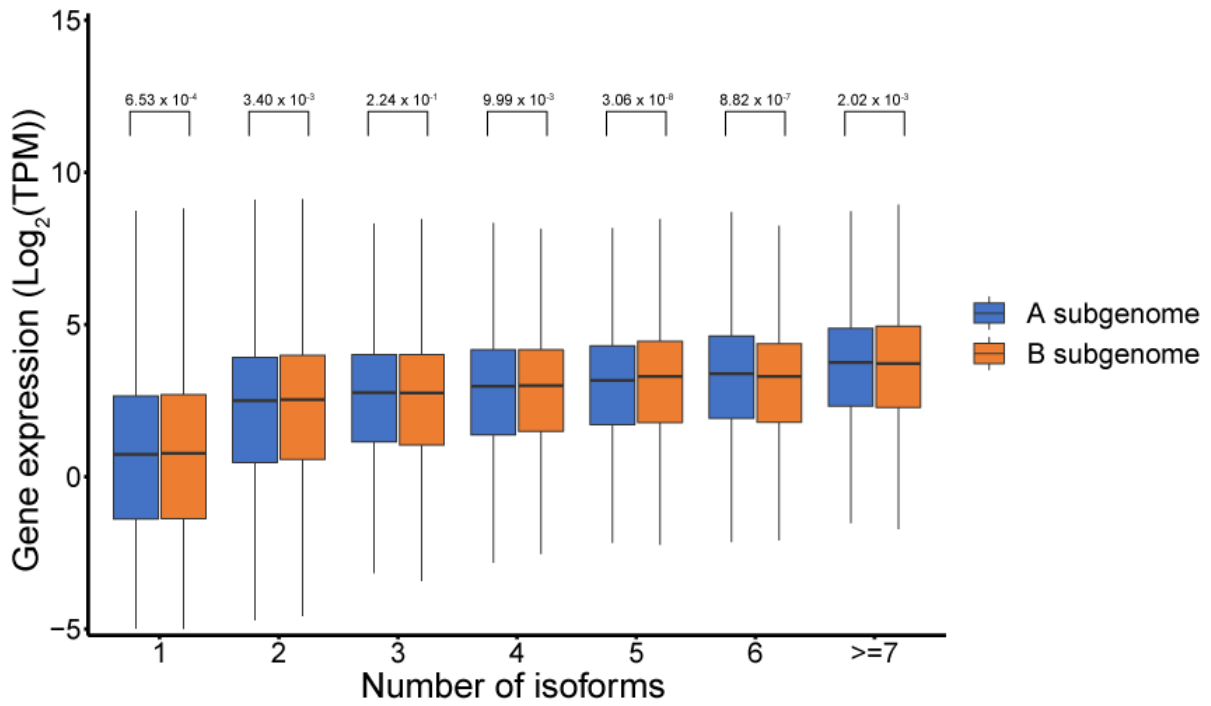

53  
 54 The boxplot showed expression levels of genes with varying numbers of isoforms in the A and B  
 55 subgenomes. *P* values derived from Wilcoxon rank-sum test were annotated in the graph.

56  
 57  
 58  
 59

60 **Fig. S10. Statistics on the number of isoforms expressed in nine organs**

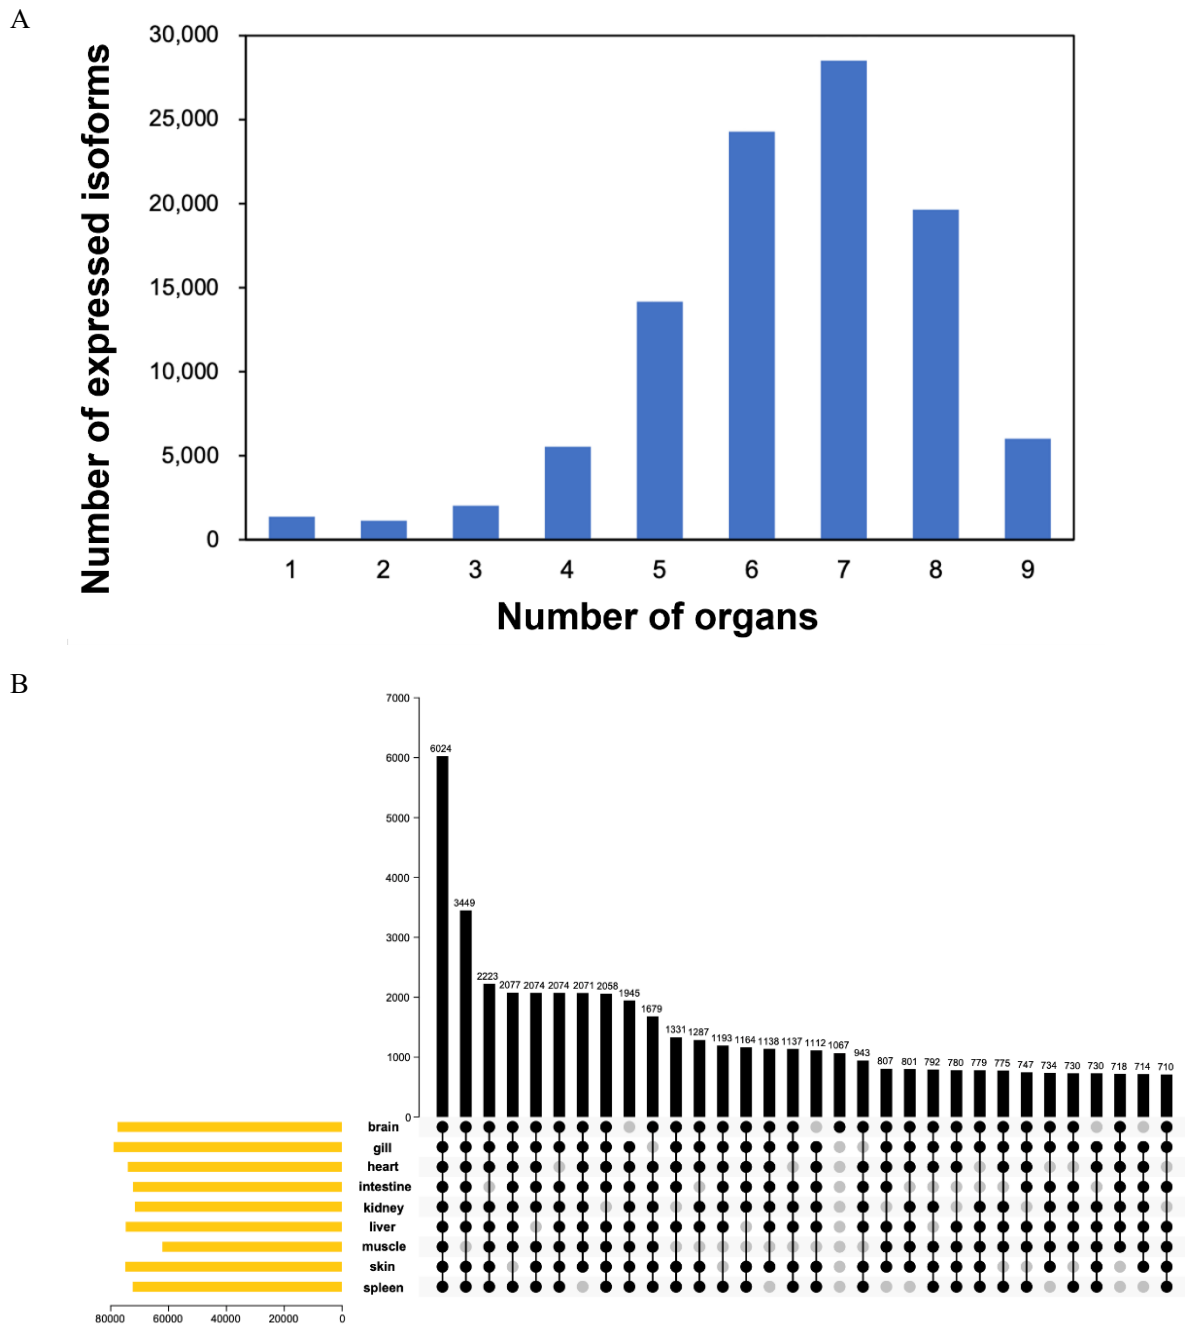

61 (A) Histogram of the number of isoforms expressed in different organs. X axis means the number of organs  
 62 in where isoforms were expressed. (B) Upset plot depicting the number of unique and shared isoforms in each  
 63 organ. The orange bars on the left indicated the total number of expressed isoforms in each organ. The set of  
 64 isoforms shared between organs was represented by black dots connected by lines, and the number was  
 65 displayed by the top vertically aligned bar plot.

66  
 67

68 **Fig. S11. Summary of GO terms enriched in genes with alternative splicing**  
 69 **in the A and B subgenomes**

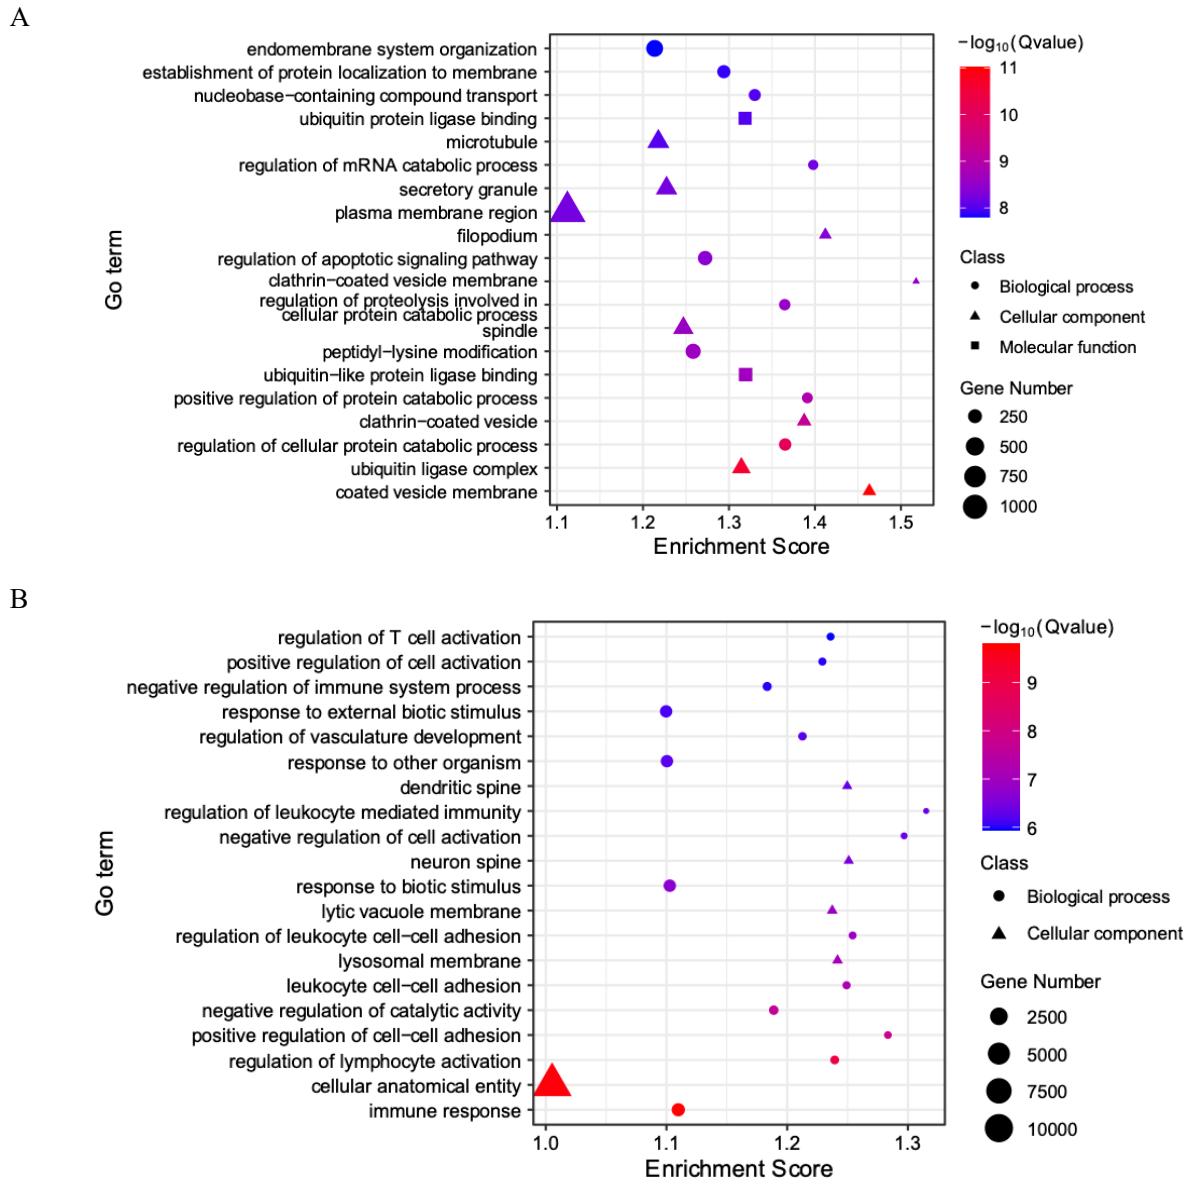

70 The specific (top 20) enriched GO terms associated with genes with AS in the A (A) and B (B) subgenomes.  
 71 The Q value was defined as the *P* value corrected by the BH (Benjamini & Hochberg, 1995) method.

72  
 73

74 **Fig. S12. Summary of alternative splicing events identified by Illumina and**  
75 **SMRT sequencing**

A

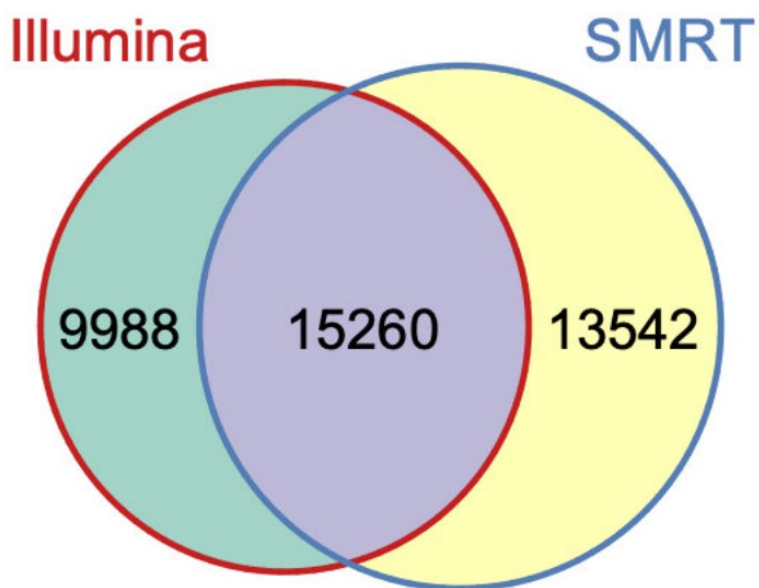

B

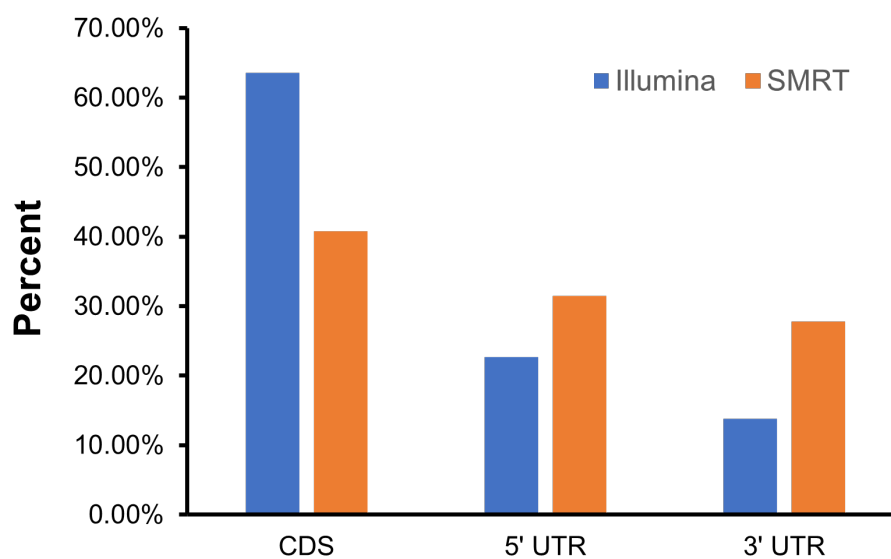

76 (A) Venn diagram showed the overlap of alternative splicing (AS) events identified by Illumina and SMRT  
77 sequencing. (B). The bar plot illustrated the positional distribution of AS events on transcripts, as identified  
78 by Illumina and SMRT sequencing methods.

79  
80

81 **Fig. S13. Length distribution of lncRNAs in the updated annotation**

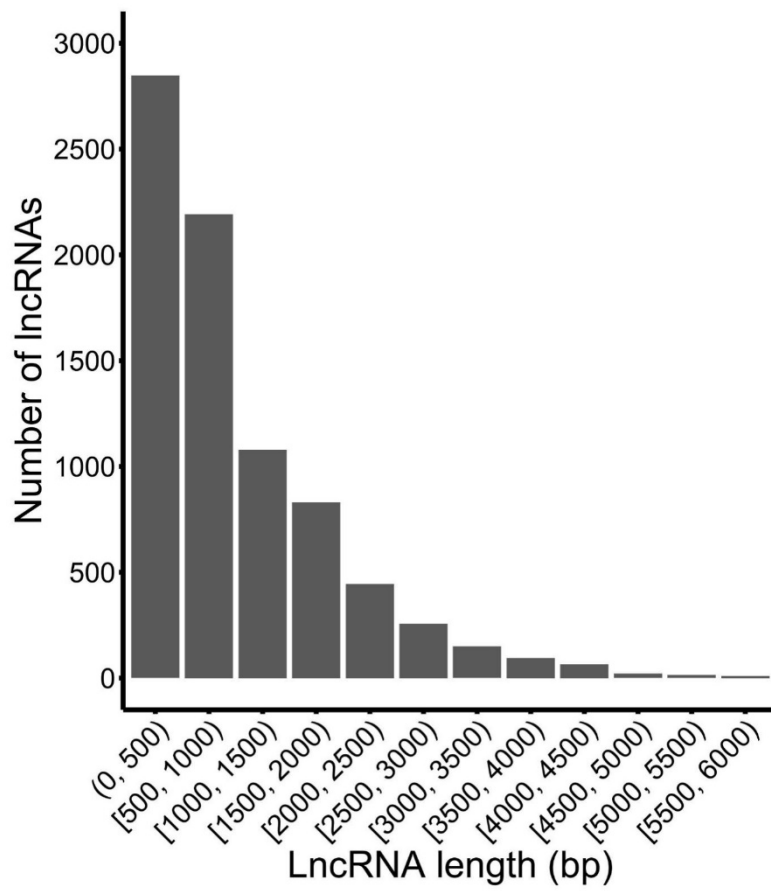

82  
83  
84  
85  
86  
87  
88  
89

90 **Fig. S14. Schematic of collinearity between lncRNAs originating from the A**  
91 **and B subgenomes in common carp**

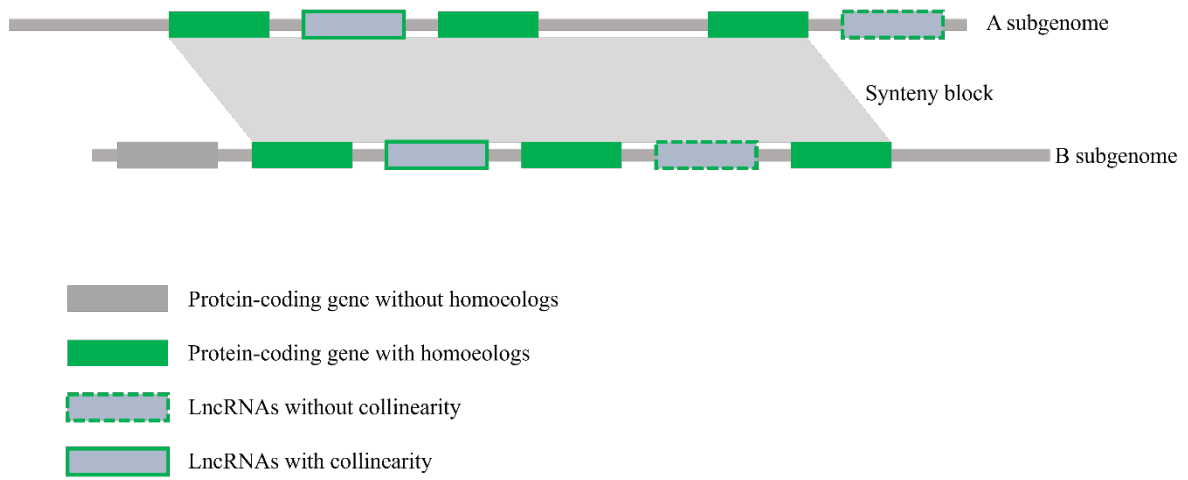

92  
93  
94



95 **Fig. S15. Comparison of expression patterns of lncRNAs and protein-coding**  
 96 **mRNAs in nine organs**

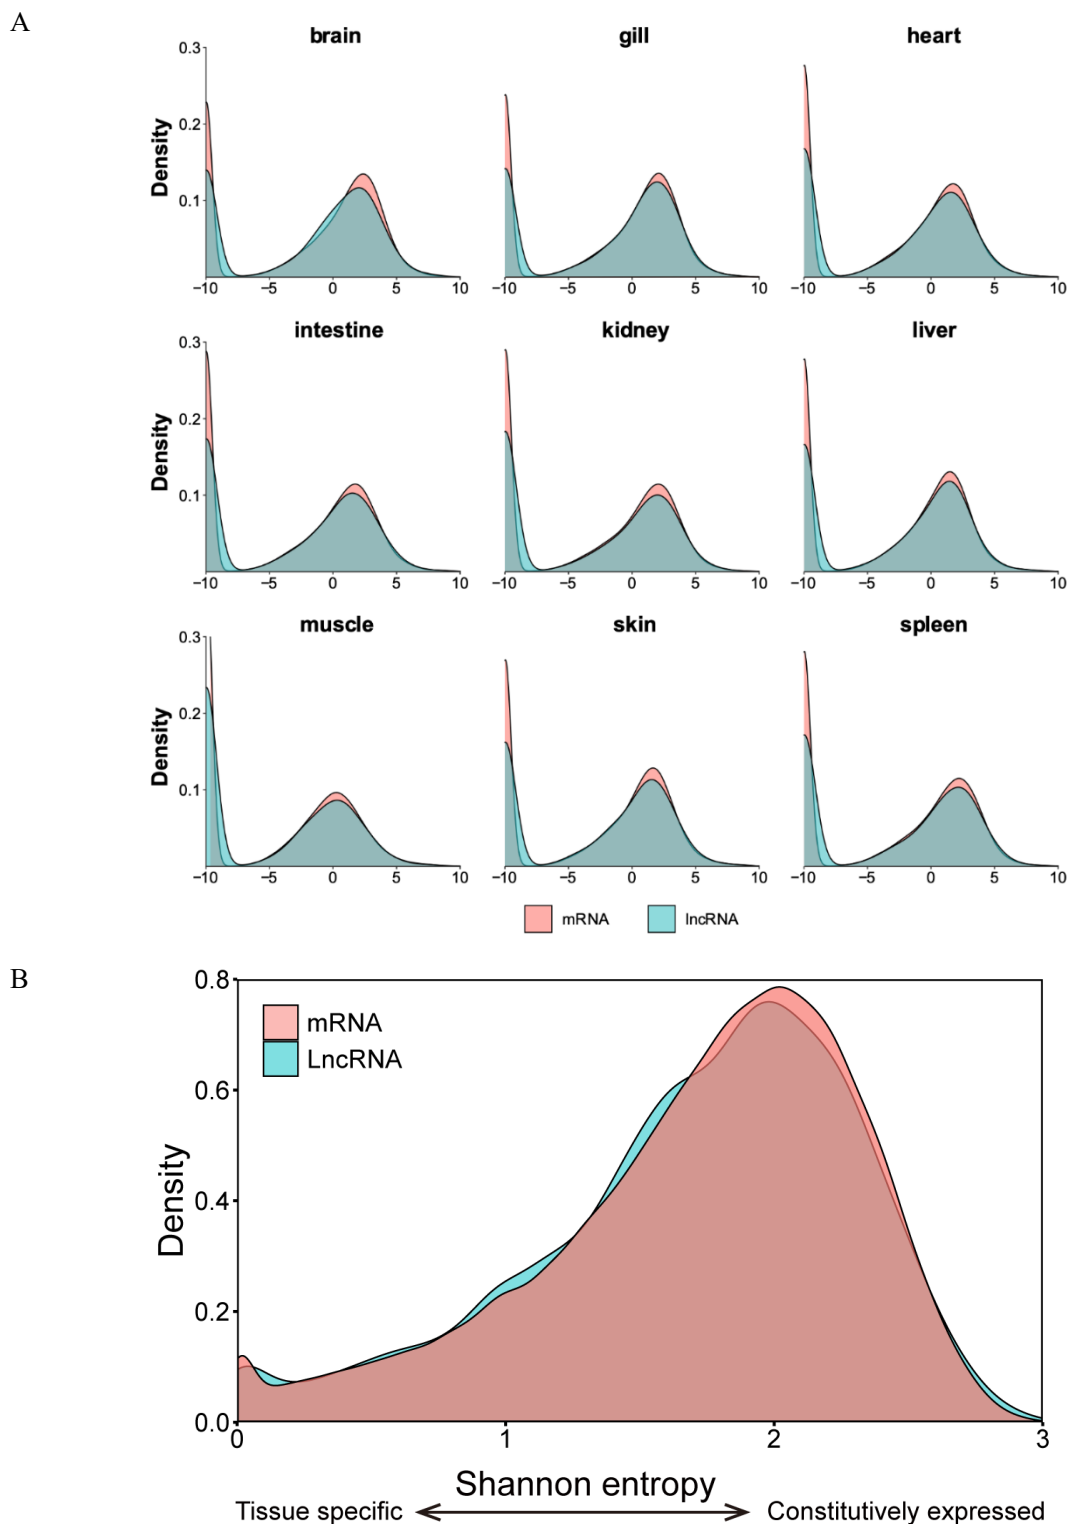

97 (A) The X-axis showed the TPM normalized by the Log<sub>2</sub> function in R, and all values had been added  
 98 0.001 to eliminate missing data. LncRNA and mRNA showed similar expression levels in nine organs.  
 99 (B). Density plot of Shannon entropy of lncRNA and mRNA with protein-coding potential. LncRNA and  
 100 mRNA showed similar tissue specificity in common carp.

101 **Fig. S16. Comparison of the lncRNA expression levels in the A and B**  
102 **subgenomes**

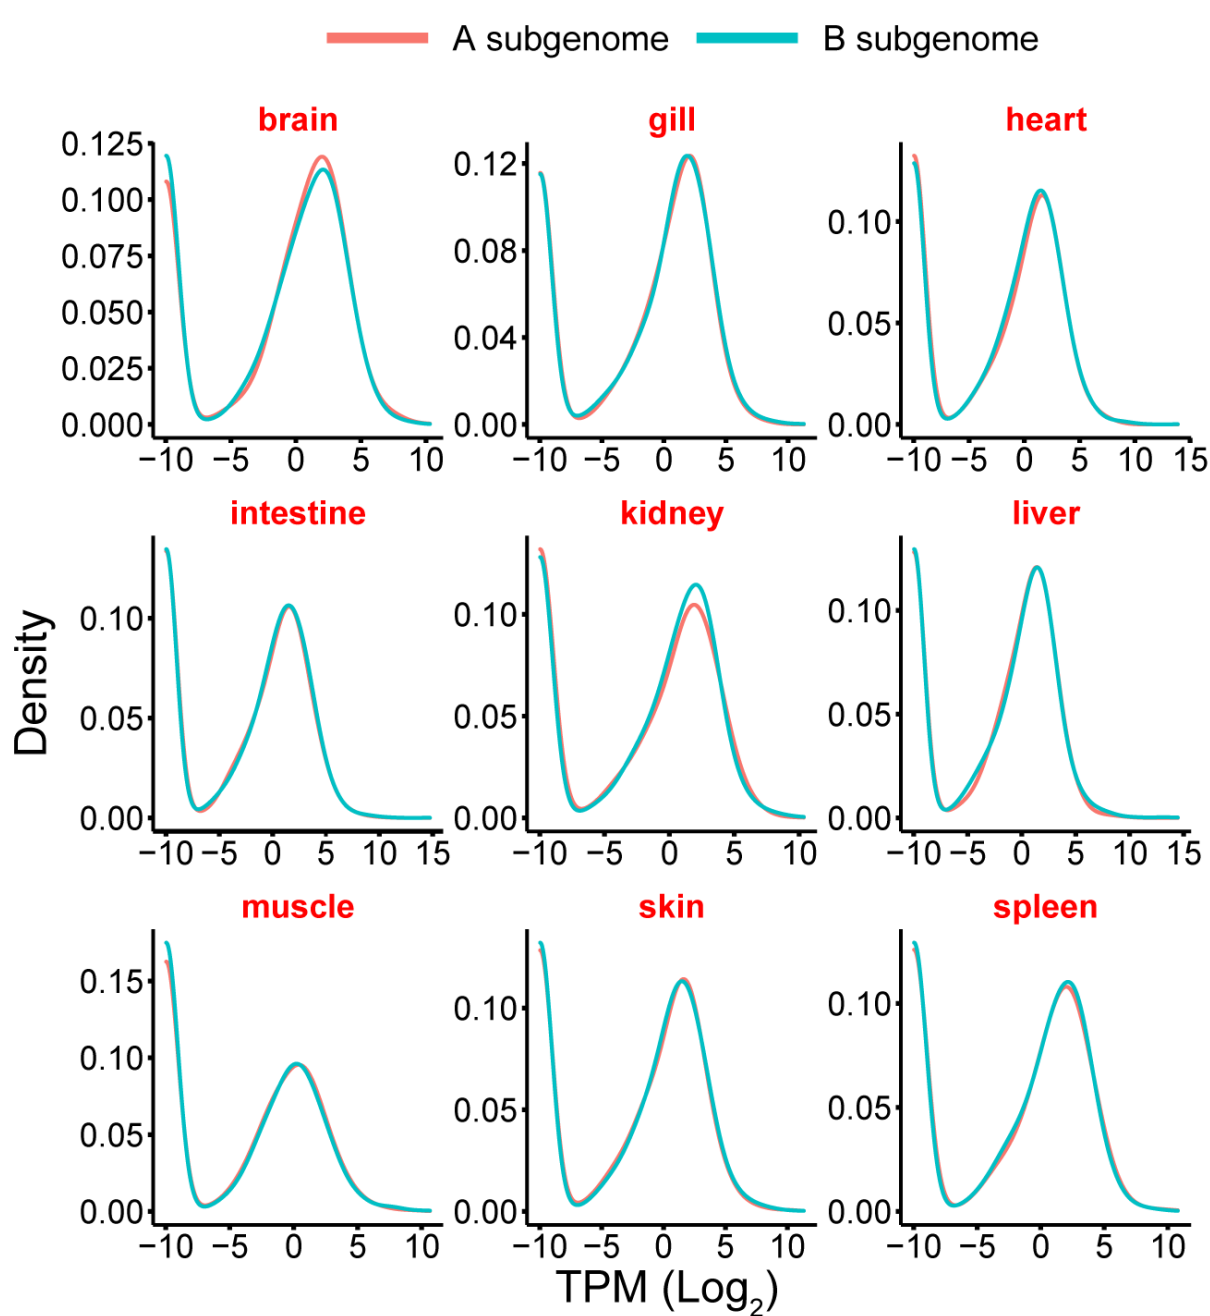

103 The X-axis showed the TPM normalized by the Log<sub>2</sub> function in R, and all values had been added 0.001 to  
104 eliminate missing data. LncRNAs originating from the A and B subgenomes showed similar expression  
105 levels.  
106  
107

108 **Fig. S17. Summary of GO terms enriched in lncRNA host genes in the A**  
 109 **and B subgenomes**

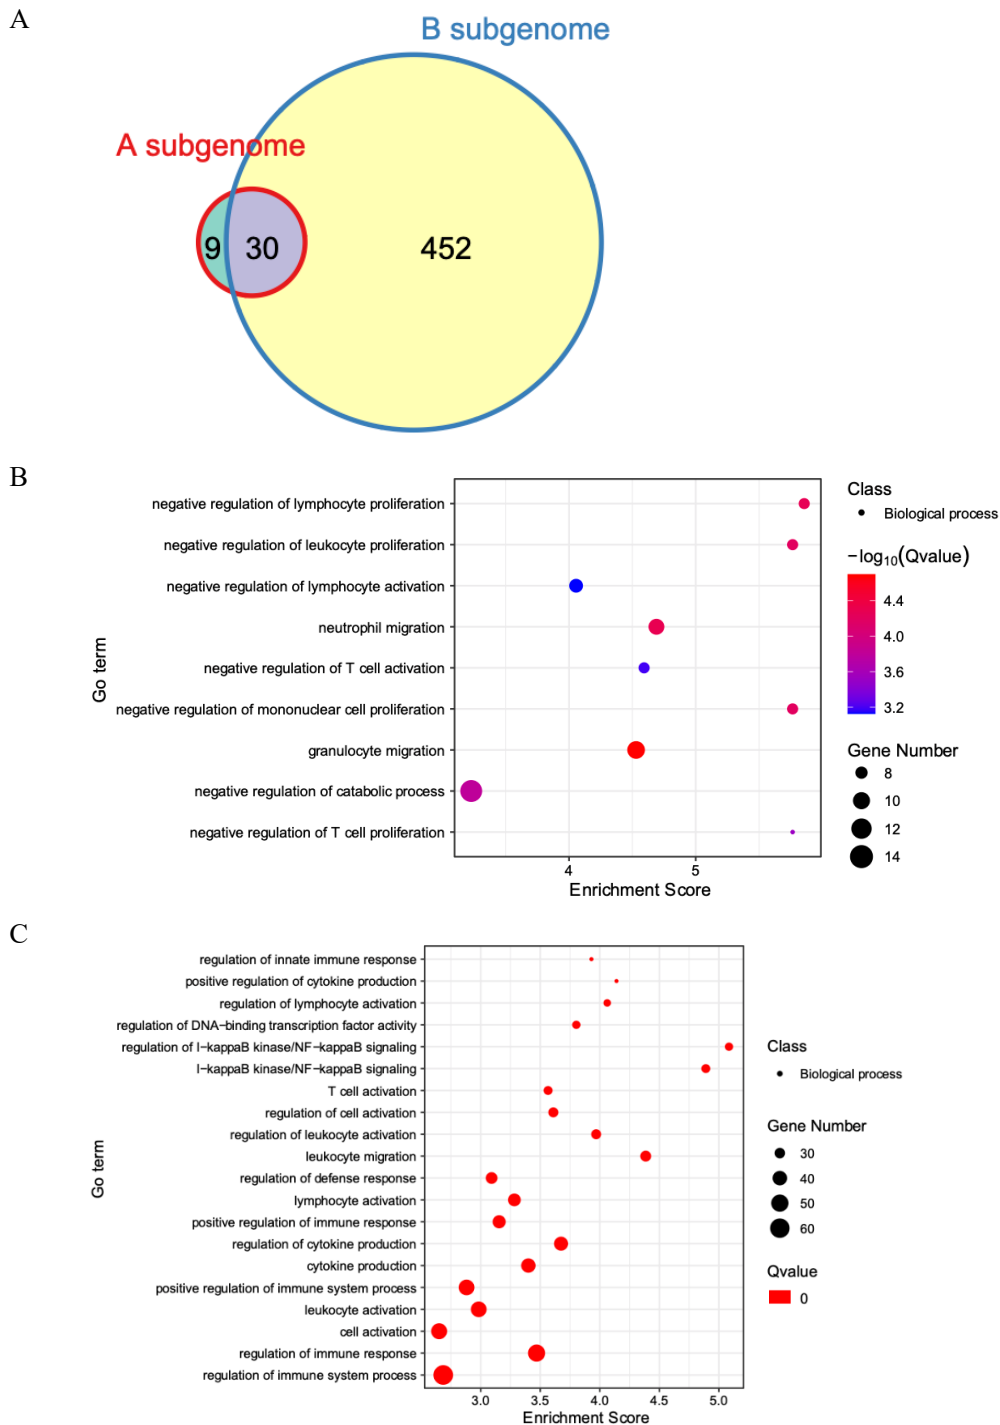

(A) Venn diagram of GO terms enriched in lncRNA host genes in the A and B subgenomes. Bubble plot showing GO terms only found in the A subgenome (B) and top twenty specific terms in the B subgenome (C). The Q value was defined as the P value corrected by the BH (Benjamini & Hochberg, 1995) method.

110 **Fig. S18. Expression correlation and Euclidean distance of lncRNA-mRNA**  
 111 **pairs in common carp**

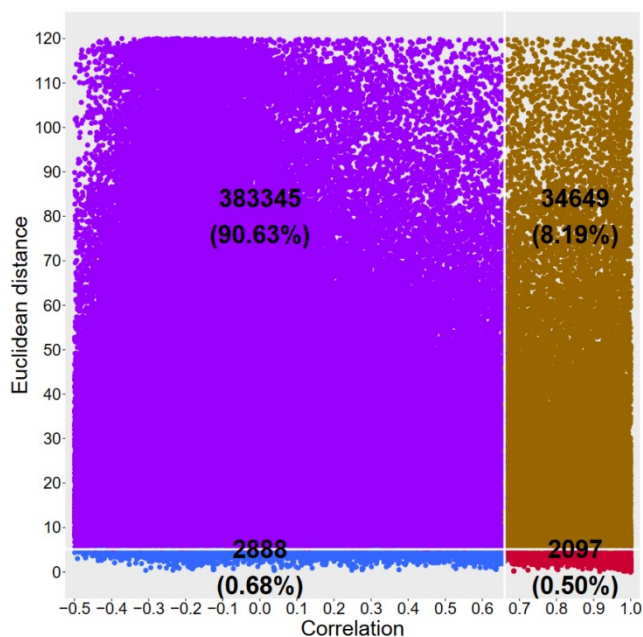

112  
 113 The scatterplot of the expression correlations (x-axis) and Euclidean distances (y-axis) of lncRNA-mRNA  
 114 pairs. The figure was gapped by the 90<sup>th</sup> quantile of Euclidean distance and expression correlation of 0.667,  
 115 and total pairs were classified into four groups. The top left (purple) showed lncRNA-mRNA pairs with  
 116 high Euclidean distances (greater than or equal to the 10<sup>th</sup> Euclidean distance threshold) and low correlation  
 117 ( $\leq 0.667$ ); the bottom left (blue) showed with low Euclidean distance and low correlation; upper right  
 118 (brown) showed with high Euclidean distance and high correlation; and lncRNA-mRNA pairs in the lower  
 119 right (red) had low Euclidean distance and high correlation. Each box listed the number and percentage (in  
 120 brackets) of lncRNA-mRNA pairs for each group. The majority of lncRNA-mRNA pairs (90.63%) had  
 121 divergent expression patterns with large **Euclidean** distances and low correlations.

122  
 123  
 124  
 125

126 **Fig. S19. Expression correlation and Euclidean distance of lncRNA-mRNA**  
 127 **pairs in the A and B subgenomes**

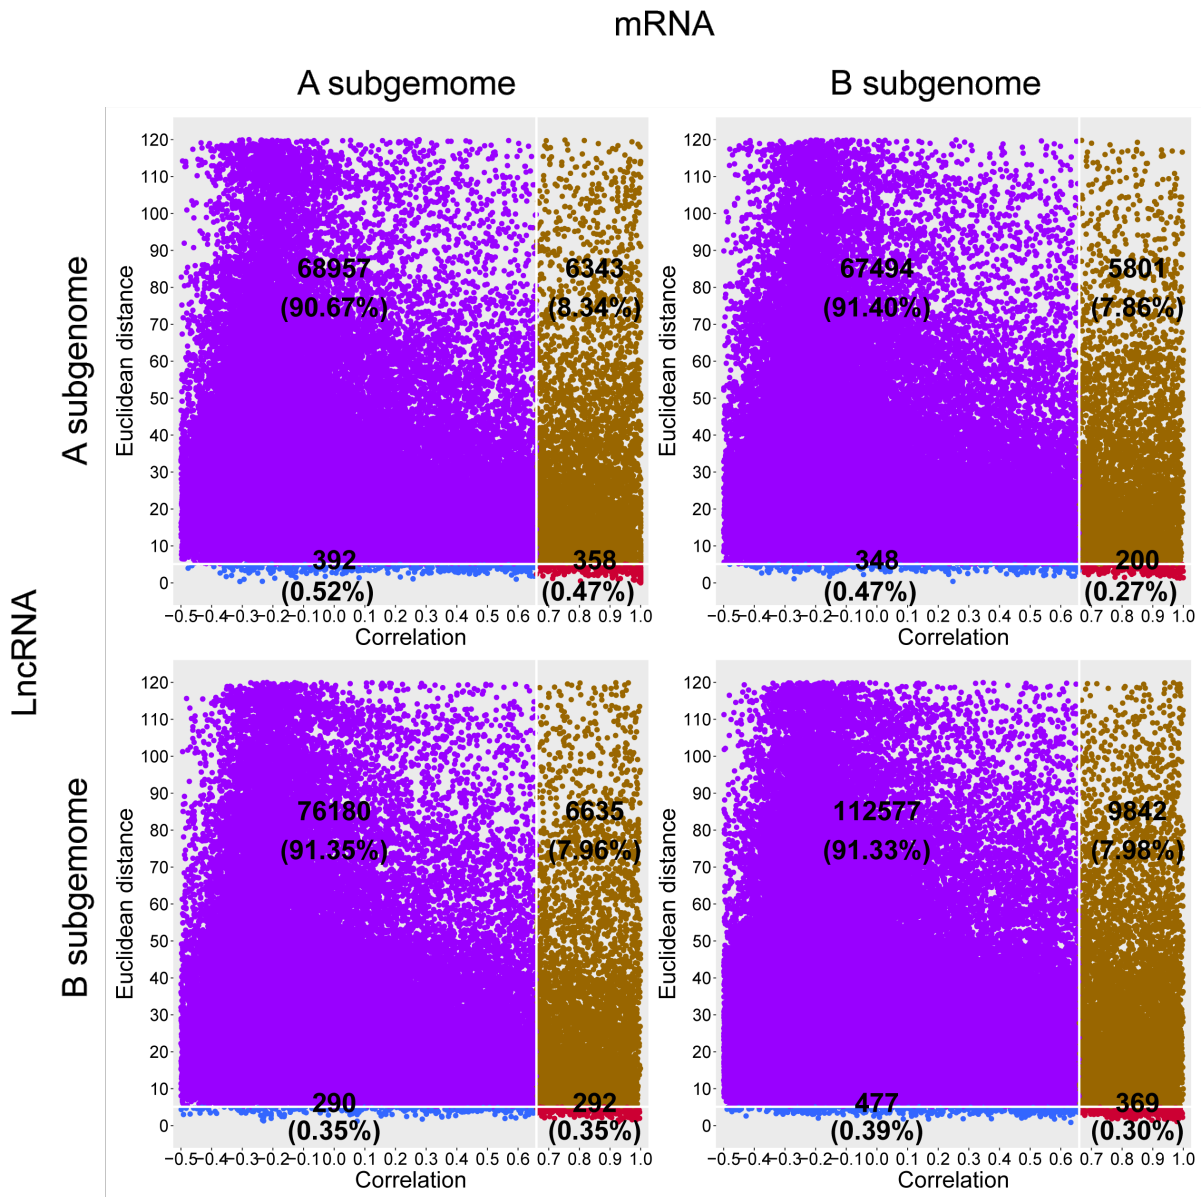

128  
 129 The scatterplot of the expression correlations (x-axis) and Euclidean distances (y-axis) of lncRNA-mRNA  
 130 pairs. Top left: lncRNA (in the A subgenome) and mRNA (in the A subgenome), Top right: lncRNA (in the  
 131 A subgenome) and mRNA (in the B subgenome), Bottom left: lncRNA (in the B subgenome) and mRNA  
 132 (in the A subgenome), Bottom right: lncRNA (in the B subgenome) and mRNA (in the B subgenome).  
 133

134 **Fig. S20. Distribution of circRNAs in the two subgenomes of common carp**

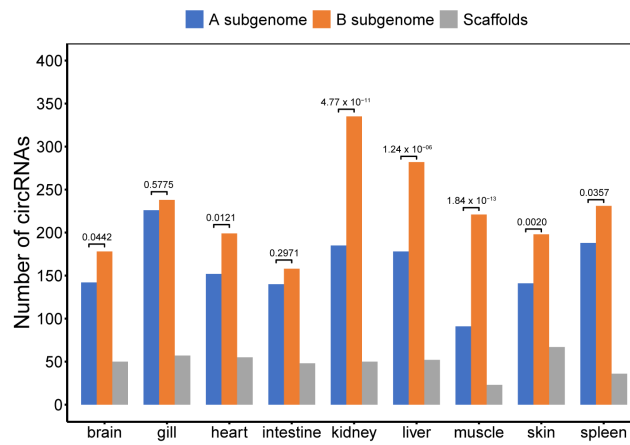

135

136 Number of circRNAs detected in nine organs. *P* values of chi-squared test were showed in the figure.

137

138 **Fig. S21. Comparison of the sequence features of introns flanking circRNA**  
139 **in the A and B subgenomes**

A

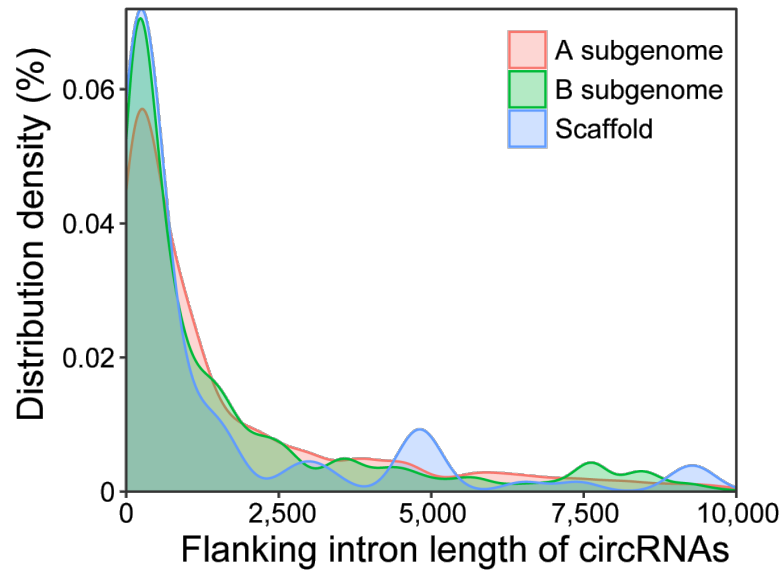

B

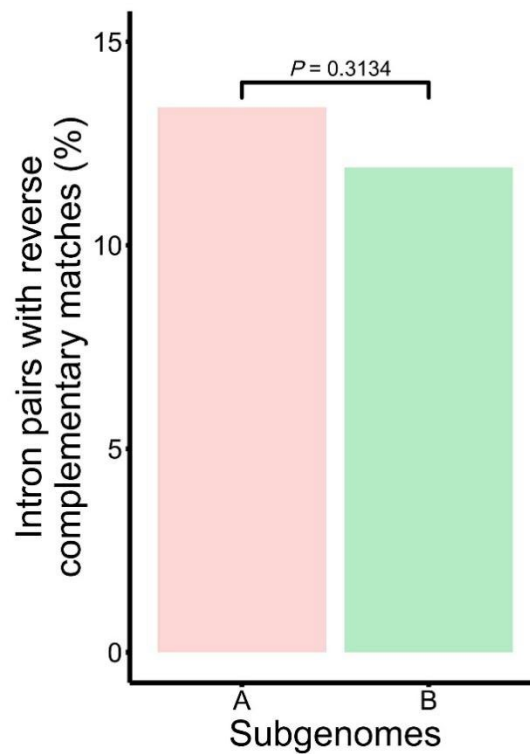

140 (A) Length distribution of introns flanking circRNA in A, B subgenomes and scaffolds. (B) Percentage of  
141 circRNAs that contain flanking intron pairs with reverse complementary matches.  $P$  Values for chi-squared  
142 test to test differences in percentage of circRNAs with reverse complementary matches across the A and B  
143 subgenomes.

144 **Fig. S22. Comparison of the percentage of flanking introns with various**  
 145 **transposons in the A and B subgenomes**

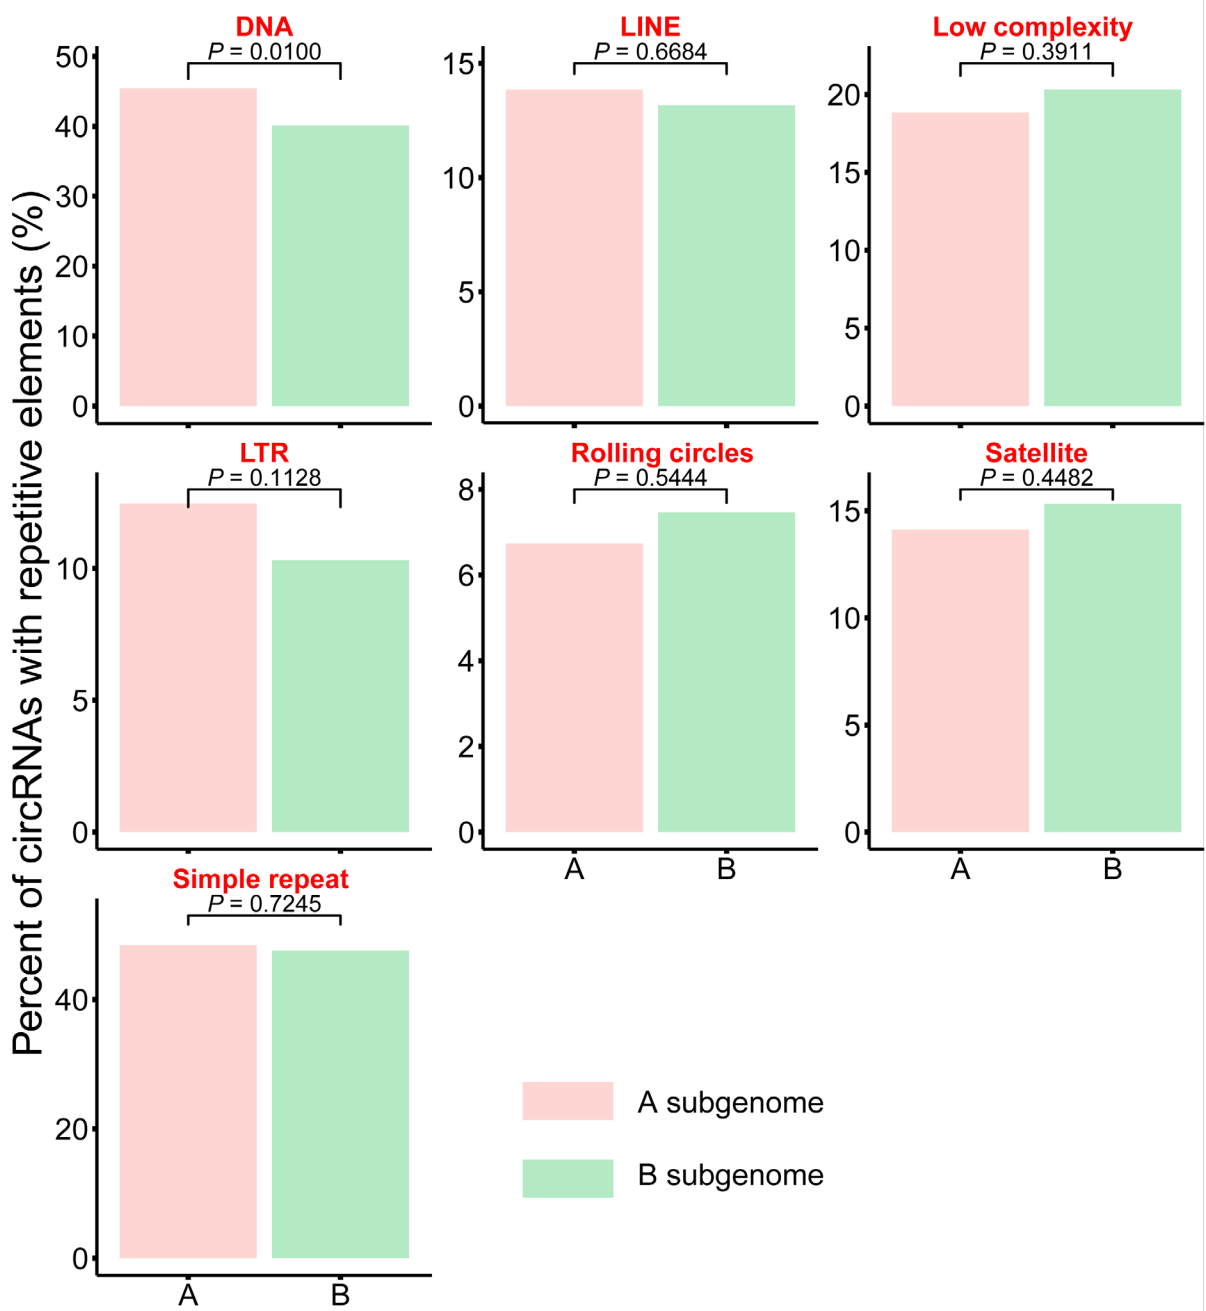

146  
 147 Comparison of percentage of flanking introns that contain transposon across the A and B subgenomes. *P*  
 148 Values for chi-squared test was showed in figure.

149  
 150  
 151



152 **Fig. S23. Expression profiling of circRNAs in nine organs**

A

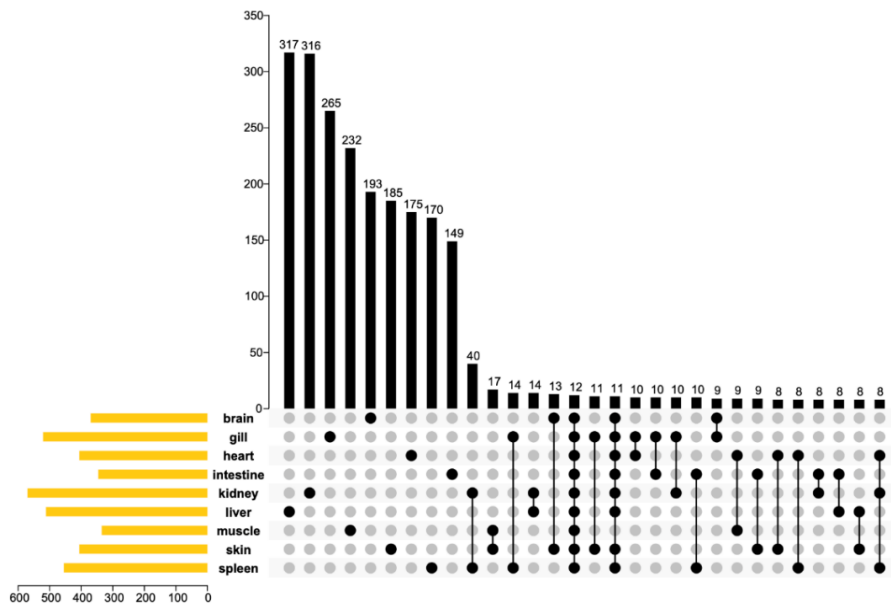

B

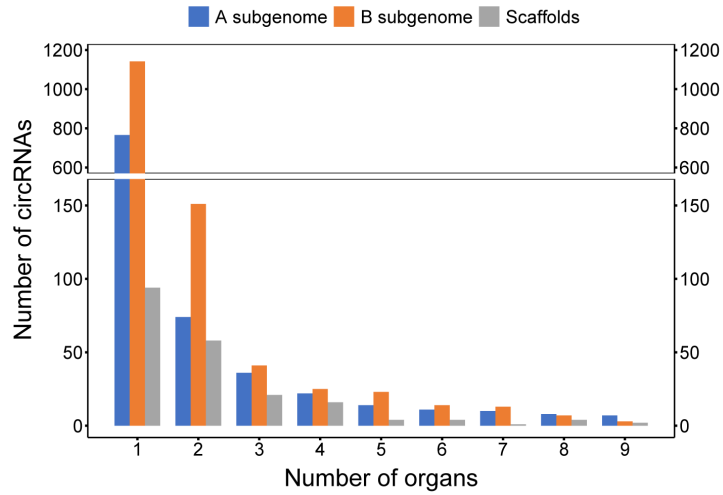

153 (A) Upset plot of circRNAs in nine organs. The orange bars on the left indicated the total number of  
 154 circRNAs in each organ. The unique or shared circRNAs was represented by black dots connected by lines,  
 155 and the top vertically aligned bar plot indicated the intersection size of circRNAs in nine organs. (B)  
 156 Number of circRNAs shared with different organs.

157 **Fig. S24. Number and base substitution frequency of various types of RNA**  
 158 **editing sites**

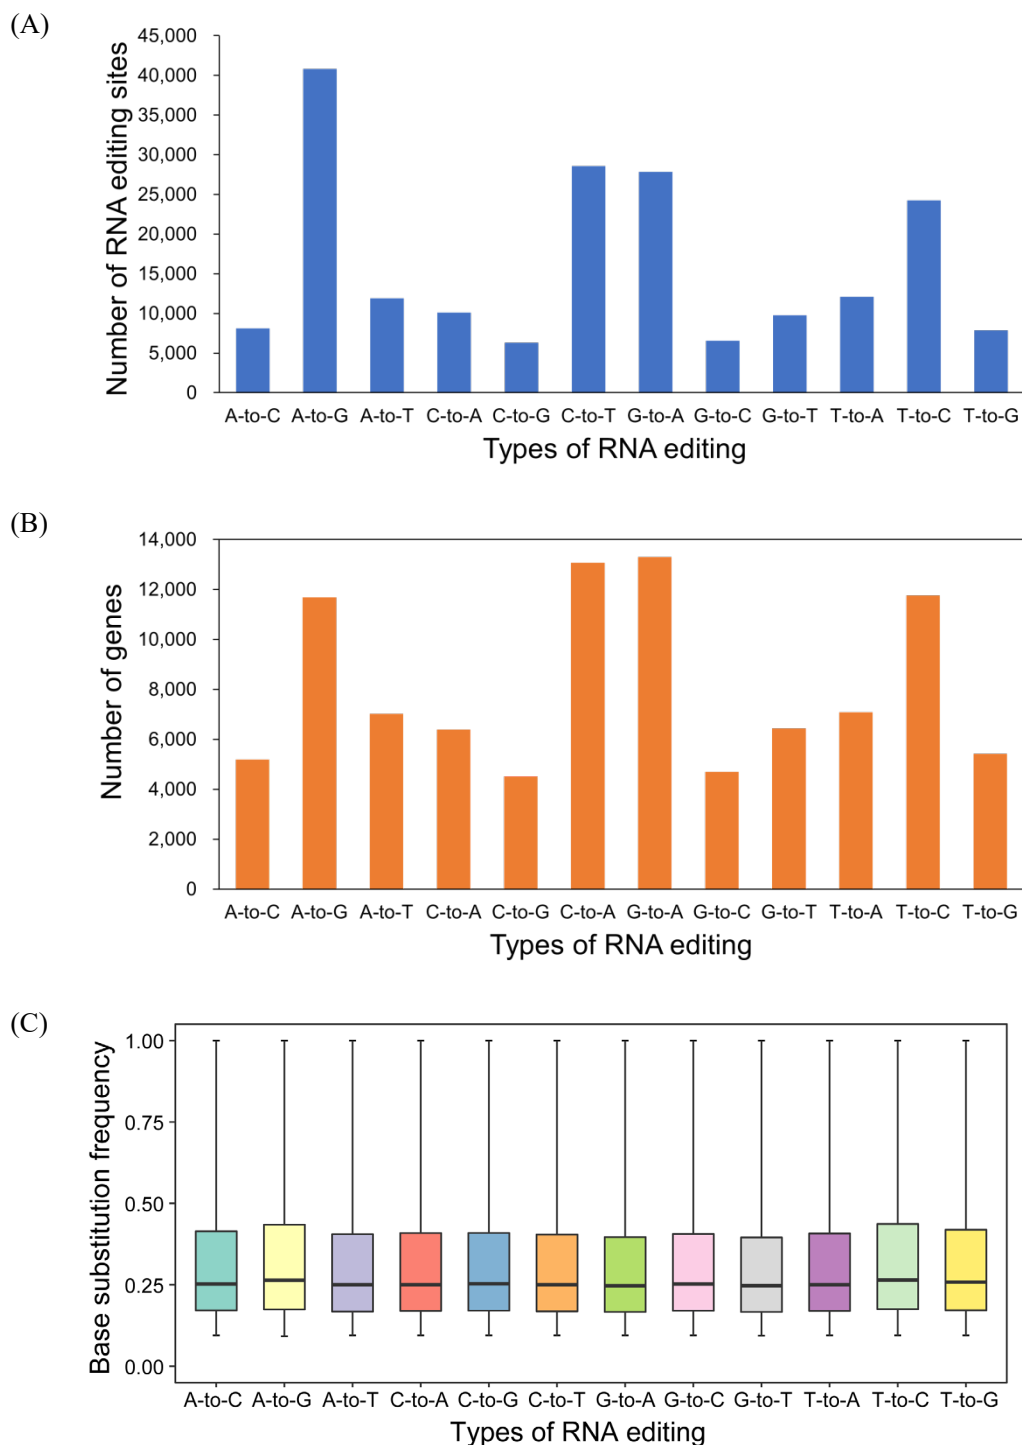

159 (A) The bar plot representing the number of different types of RNA editing. (B) The bar plot illustrating the  
 160 number of genes undergoing different types of RNA editing. (C) The box plot depicting the base  
 161 substitution frequency of different RNA editing types.  
 162

**Fig. S25. Upset plot of RNA editing sites identified in nine organs**

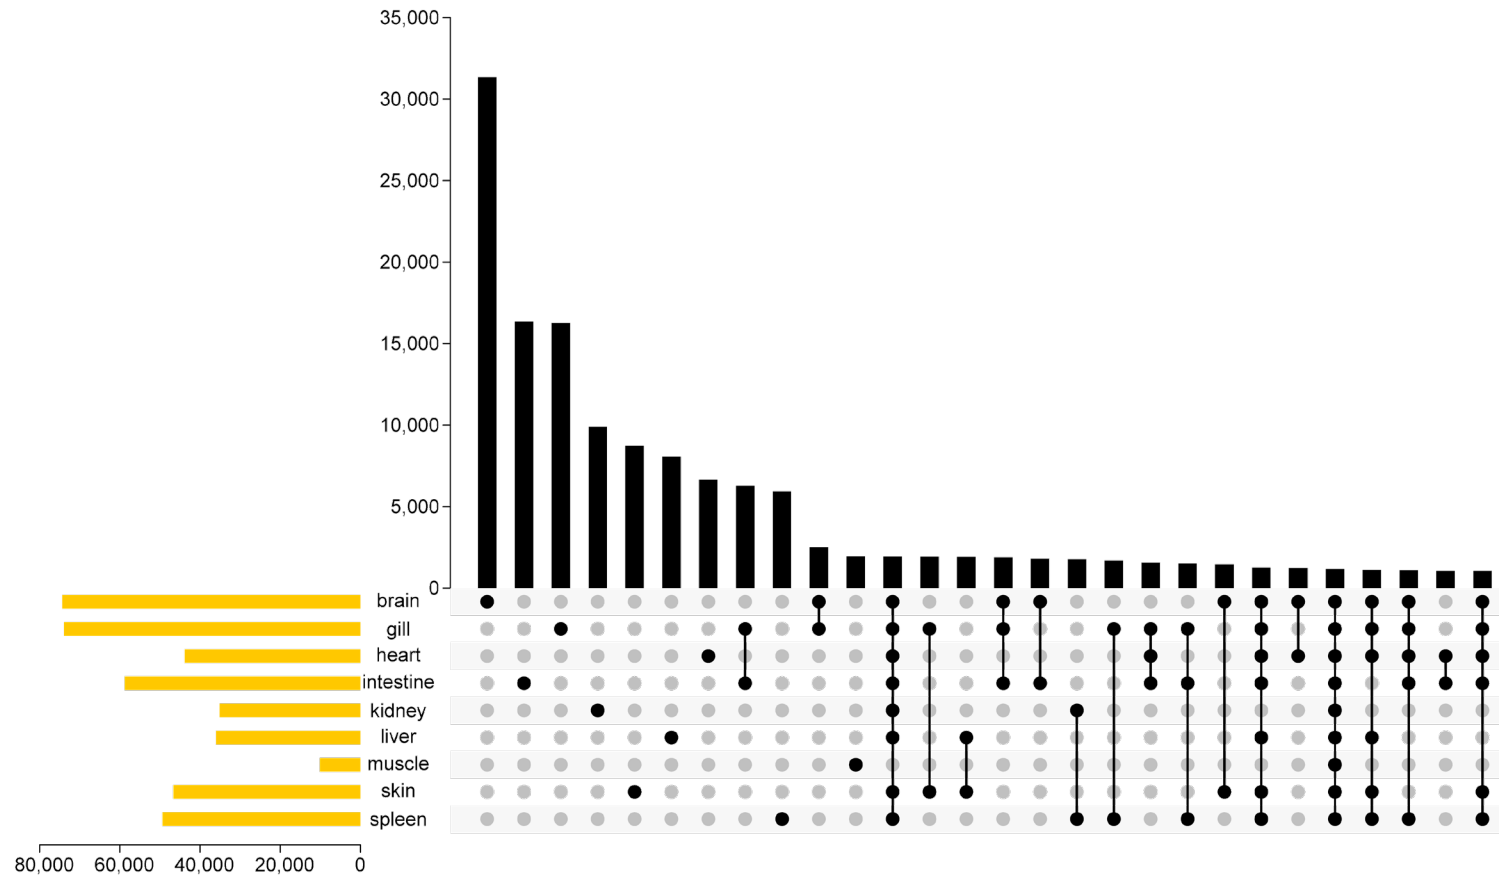

Upset plot showed the overlap of all RNA editing sites detected in nine organs. The orange bars on the left indicated the total number of RNA editing sites in each organ. The top vertically aligned bar plot indicated the intersection size of unique or shared RNA editing sites in nine organs, which were represented by black dots connected by lines.

**Fig. S26. Statistics on the number of RNA editing sites in the A and B subgenomes of common carp**

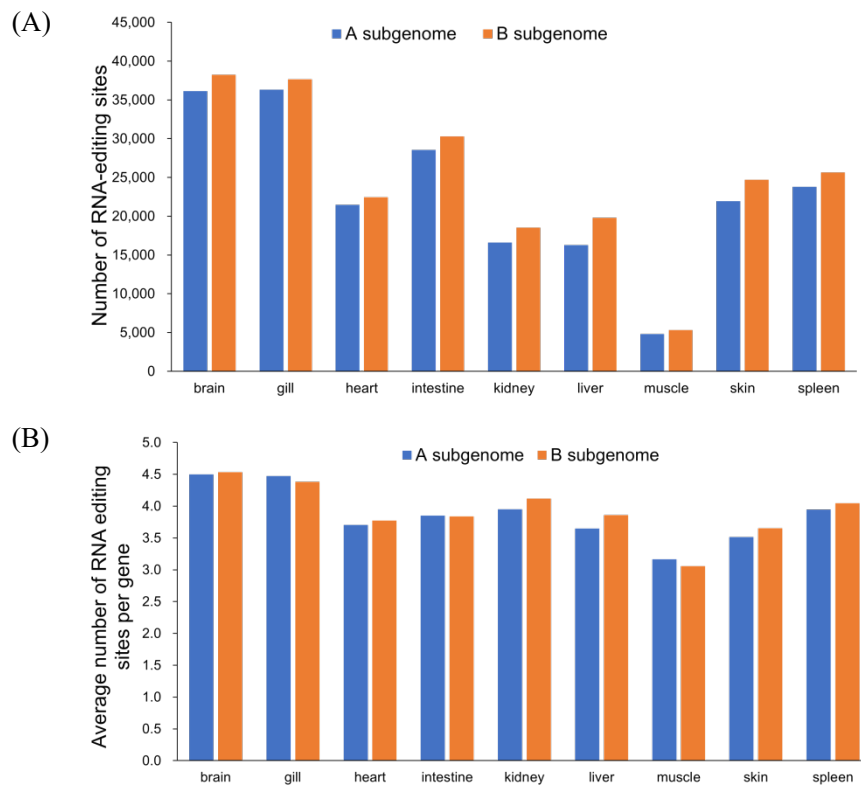

The bar plot showed the total number of RNA editing sites (A) and the average number of sites per gene (B) in nine organs of common carp.

**Fig. S27. Base substitution frequency of RNA editing sites in homoeologous genes**

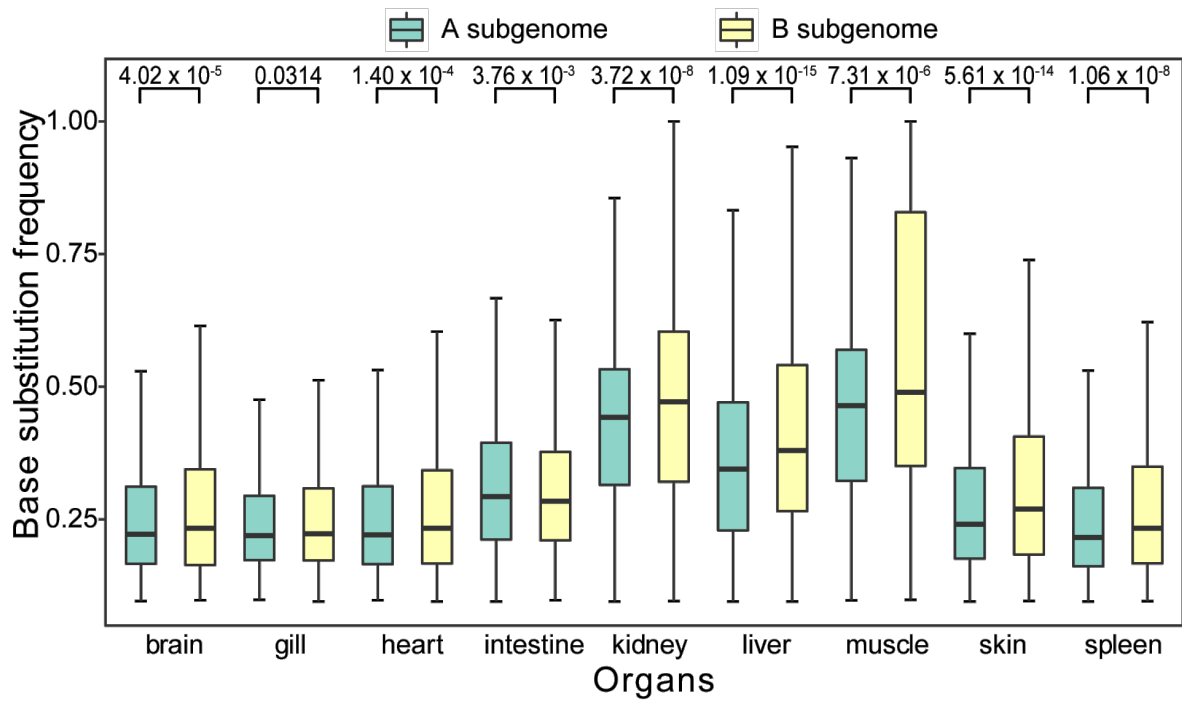

RNA editing sites on homoeologous genes in the B subgenomes showed higher base substitution frequency, as compared to the A subgenomes (Wilcoxon rank-sum test).

**Fig. S28. Comparison of base substitution frequency of RNA editing sites shared by nine organs in common carp**

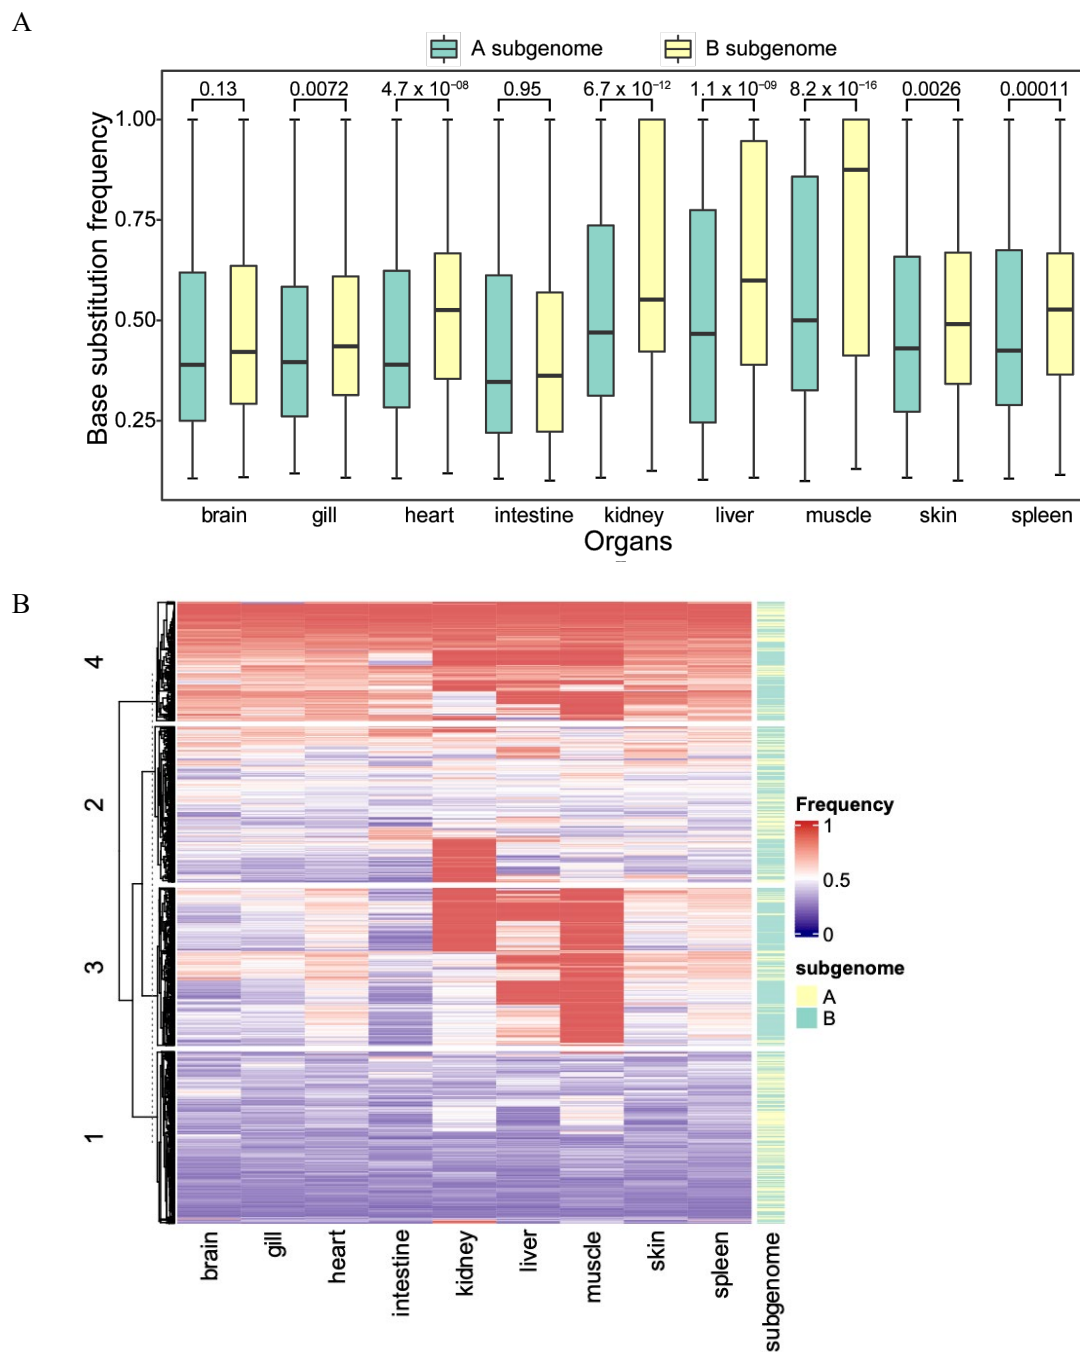

(A) The boxplot of base substitution frequency of the 1,173 RNA editing sites shared by nine organs (Wilcoxon rank-sum test). (B) The heatmap of RNA editing efficiency of the common sites.

**Fig. S29. Enrichment of RNA editing sites in various genetic elements**

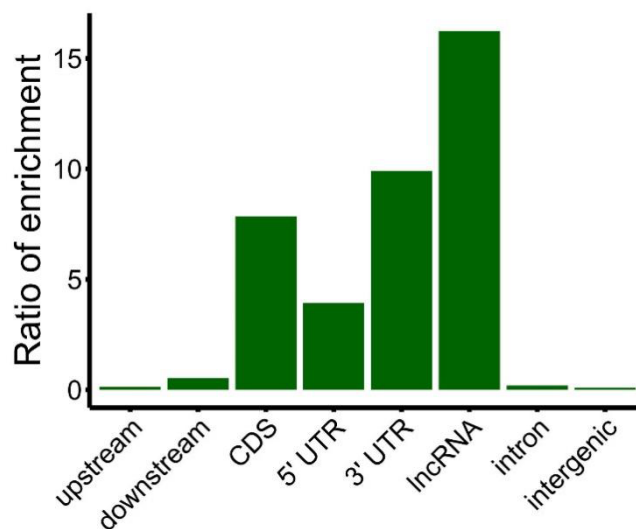

Enrichment of RNA editing sites in various genetic elements. The Y axis represents the enrichment ratio of RNA editing sites in different genetic elements. The enrichment ratio was calculated as ((The number of RNA editing sites from each genetic element category)/(Total number of RNA editing sites))/((Total length of each genetic element)/(Genome size)). RNA editing sites was preferred in lncRNA and 3' UTR regions.

**Fig. S30. Genome distribution of RNA editing sites in the A and B subgenomes**

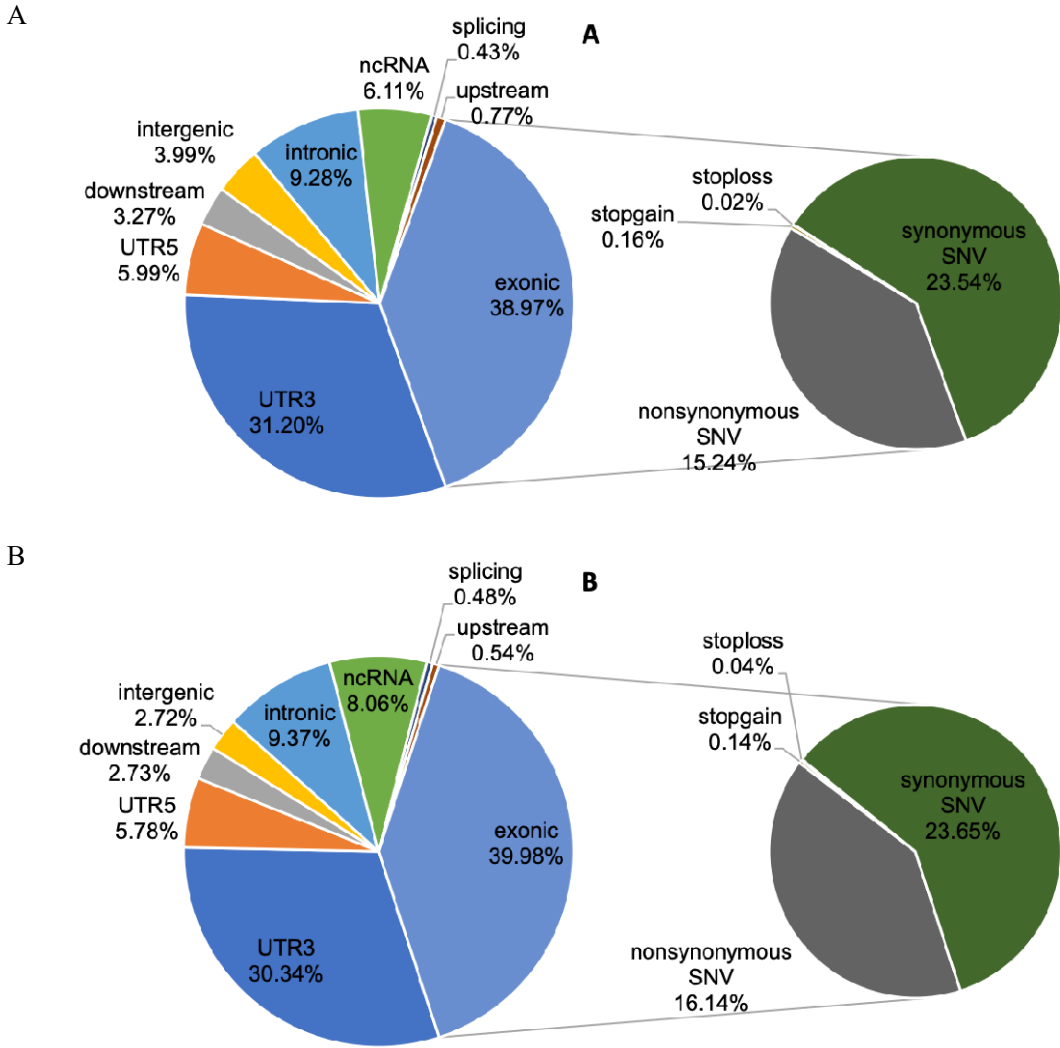

The figures showed the genome distribution of RNA editing sites in the A (A) and B (B) subgenomes, respectively.
