# Supplementary material for: An improved transcriptome annotation reveals asymmetric expression and distinct regulation patterns in allotetraploid common carp
Source: PubMed Central journal article supplement (PMC11579021; doi:10.1038/s42003-024-07177-3), 2024-11-20
Supplement: 42003_2024_7177_MOESM2_ESM.pdf [file 42003_2024_7177_MOESM2_ESM.pdf]

## **Description Of Additional Supplementary File**

**File name:** Supplementary data

**Description:** Supplementary Tables 1-13
